# Supplementary material for: Inhibition Kinetics and Theoretical Studies on Zanthoxylum chalybeum Engl. Dual Inhibitors of α-Glucosidase and α-Amylase
Source: J Xenobiot. 2023 Feb 21;13(1):102–20. doi: 10.3390/jox13010009 (PMC10059848; doi:10.3390/jox13010009)
Supplement: Supplementary file 1 [file jox-13-00009-s001.zip › supplementary jox-2148689.pdf]

# Inhibition kinetics and theoretical studies on *Zanthoxylum chalybeum* Engl. dual inhibitors of $\alpha$ -glucosidase and $\alpha$ -amylase

Njogu M. Kimani<sup>1\*</sup>, Charles O. Ochieng<sup>2</sup>, Mike Don Ogutu<sup>2</sup>, Kevin Otieno Yamo<sup>2</sup>, Joab Otieno Onyango<sup>3</sup>, and Cleydson B. R. Santos<sup>4,5</sup>

<sup>1</sup> Department of Physical Sciences, University of Embu, Embu, Kenya;

<sup>2</sup> Department of Chemistry, Maseno University, Maseno, Kenya;

<sup>3</sup> School of Chemical Sciences and Technology, Technical University of Kenya, Nairobi, Kenya

<sup>4</sup> Graduate Program in Biotechnology and Biodiversity-Network BIONORTE, Federal University of Amapá, Macapá, 68903-419, AP, Brazil

<sup>5</sup> Laboratory of Modeling and Computational Chemistry, Department of Biological and Health Sciences, Federal University of Amapá, Macapá 68902-280, AP, Brazil

|                                                                                                                            |    |
|----------------------------------------------------------------------------------------------------------------------------|----|
| S1: Lineweaver-Burk and Dixon plots for inhibition of $\alpha$ -amylase by Chalybemide A (1)                               | 2  |
| S2: Lineweaver-Burk and Dixon plot for inhibition of $\alpha$ -glucosidase by Chalybemide A (1)                            | 3  |
| S3: Lineweaver-Burk and Dixon plots for inhibition of $\alpha$ -amylase by Chalybemide B (2)                               | 4  |
| S4: Lineweaver-Burk and Dixon plots for inhibition of $\alpha$ -glucosidase by Chalybemide B (2)                           | 5  |
| S5: Lineweaver-Burk and Dixon plots for inhibition of $\alpha$ -amylase by Chalybemide C (3)                               | 6  |
| S6: Lineweaver-Burk and Dixon plots for inhibition of $\alpha$ -glucosidase by Chalybemide C (3)                           | 7  |
| S7: Lineweaver-Burk and Dixon plots for inhibition of $\alpha$ -amylase by fagaramide (4)                                  | 8  |
| S8: Lineweaver-Burk and Dixon plots for inhibition of $\alpha$ -glucosidase by fagaramide (4)                              | 9  |
| S9: Lineweaver-Burk and Dixon plots for inhibition of $\alpha$ -amylase by Skimmianine (5)                                 | 10 |
| S10: Lineweaver-Burk) and Dixon plots for inhibition of $\alpha$ -glucosidase by Skiamminine (5)                           | 11 |
| S11: Lineweaver-Burk and Dixon plots for inhibition of $\alpha$ -amylase by Norchelerythrine (6)                           | 12 |
| S12: Lineweaver-Burk and Dixon plots for inhibition of $\alpha$ -glucosidase by Norchelerythrine (6)                       | 13 |
| S13: Lineweaver-Burk and Dixon plots for inhibition of $\alpha$ -amylase by 6-Acetyldihydrochelerythrine (7)               | 14 |
| S14: Lineweaver-Burk and Dixon plots for inhibition of $\alpha$ -glucosidase by 6-Acetyldihydrochelerythrine (7)           | 15 |
| S15: Lineweaver-Burk) and Dixon plots for inhibition of $\alpha$ -amylase by 6-hydroxy-N-methyldecarine (8)                | 16 |
| S16: Lineweaver-Burk and Dixon plots for inhibition of $\alpha$ -glucosidase by 6-hydroxy-N-methyldecarine (8)             | 17 |
| S17: Lineweaver-Burk and Dixon plots for inhibition of $\alpha$ -amylase by Ailanthodial (9)                               | 18 |
| S18: Lineweaver-Burk) and Dixon plots for inhibition of $\alpha$ -glucosidase by Ailanthoidol (9)                          | 19 |
| S19: Lineweaver-Burk and Dixon plots for inhibition of $\alpha$ -amylase by 2,3-epoxy-6,7-methylenedioxyconiferol (10)     | 20 |
| S20: Lineweaver-Burk and Dixon plots for inhibition of $\alpha$ -glucosidase by 2,3-epoxy-6,7-methylenedioxyconiferol (10) | 21 |
| S21: Lineweaver-Burk and Dixon plots for inhibition of $\alpha$ -amylase by Sesamine (11)                                  | 22 |
| S22: Lineweaver-Burk) and Dixon plots for inhibition of $\alpha$ -glucosidase by Sesamine (11)                             | 23 |
| S23: Lineweaver-Burk and Dixon plots for inhibition of $\alpha$ -amylase by acarbose                                       | 24 |
| S24: Lineweaver-Burk and Dixon plots for inhibition of $\alpha$ -glucosidase by Acarbose                                   | 25 |

S25: 2D interactions of compounds 1-11 and the reference Acarbose with  $\alpha$ -amylase enzyme (PDB ID: 7TAA). 26

S26: 2D interactions of compounds 1-11 and the reference Acarbose with  $\alpha$ -glucosidase enzyme (PDB ID: 2QMJ). 26

S27: 3D interactions of compounds 1-11 and the reference Acarbose with  $\alpha$ -amylase enzyme (PDB ID: 7TAA). 27

S28: 3D interactions of compounds 1-11 and the reference Acarbose with  $\alpha$ -glucosidase enzyme (PDB ID: 2QMJ). 28

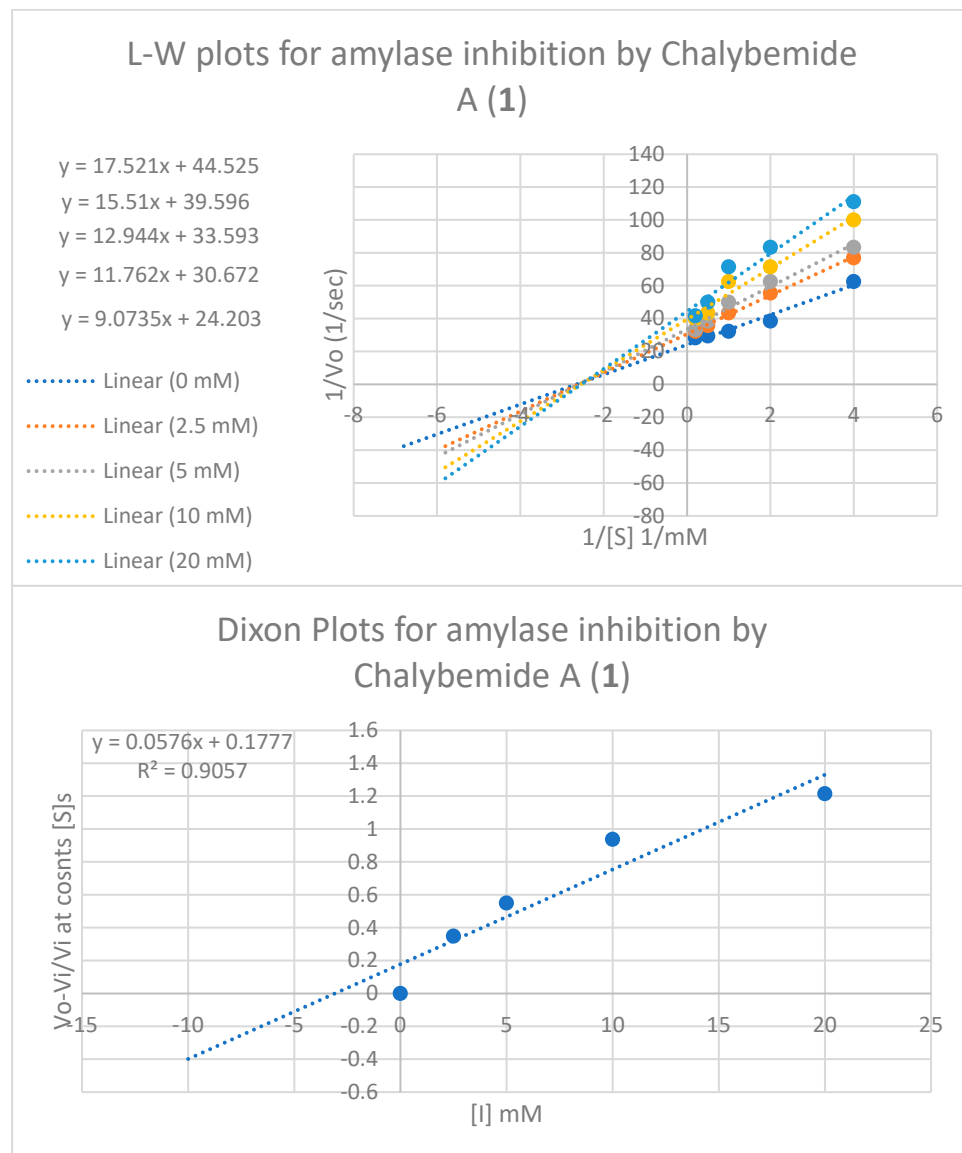

**Figure S1:** A- Double reciprocal (Lineweaver-Burk) plot for inhibition of  $\alpha$ -amylase (non-competitive inhibition,  $K_m = 2.59$  mM); B- Dixon plot for Chalybemide A (1),  $K_i = 13.36$  mM.

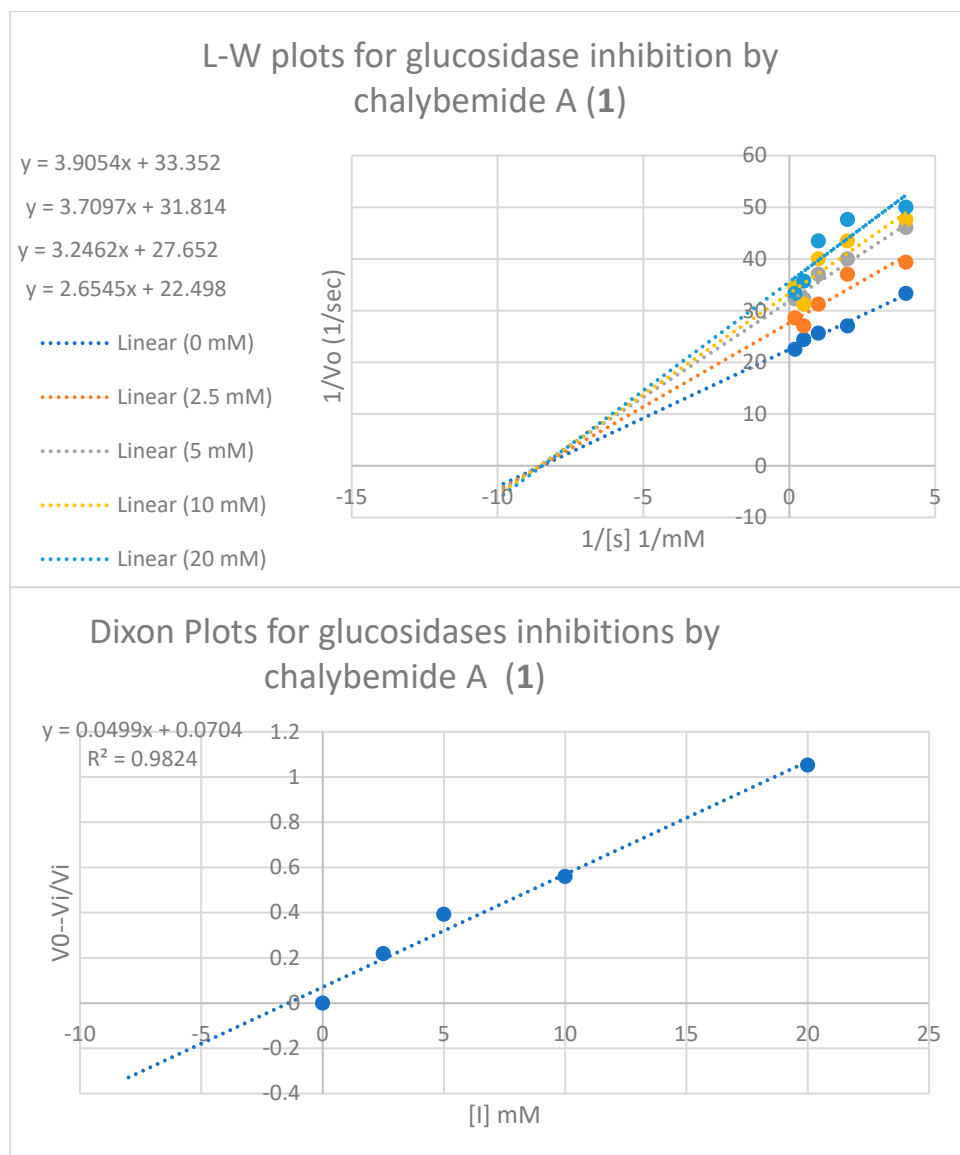

**Figure S2:** A- Double reciprocal (Lineweaver-Burk) plot for inhibition of  $\alpha$ -glucosidase (non-competitive inhibition,  $K_m = 8.53$  mM); B- Dixon plot for Chalybemide A (1),  $K_i = 20.95$  mM.

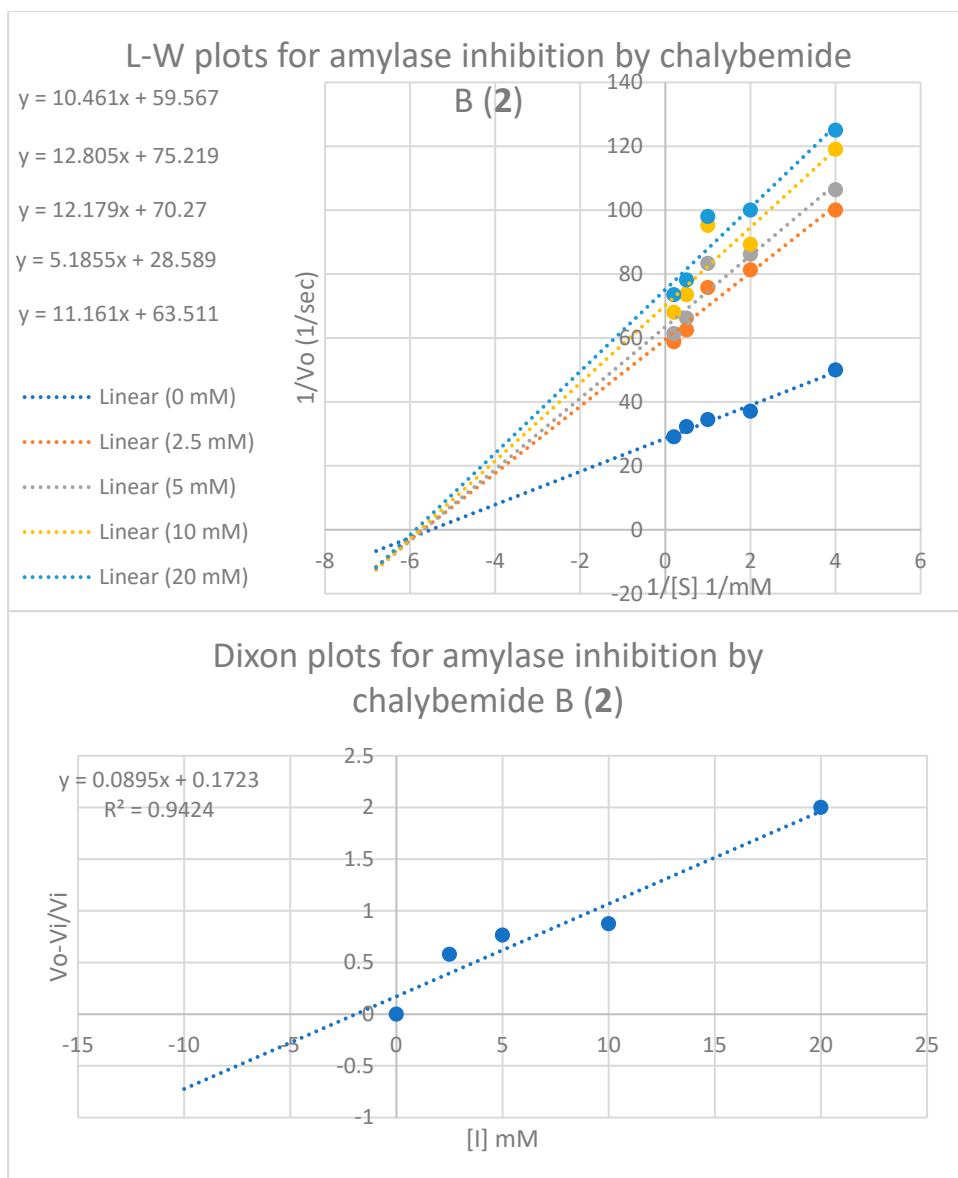

**Figure S3:** A- Double reciprocal (Lineweaver-Burk) plot for inhibition of  $\alpha$ -amylase (non-competitive inhibition,  $K_m = 5.53$  mM); B- Dixon plot for Chalybemide B (2),  $K_i = 11.05$  mM.

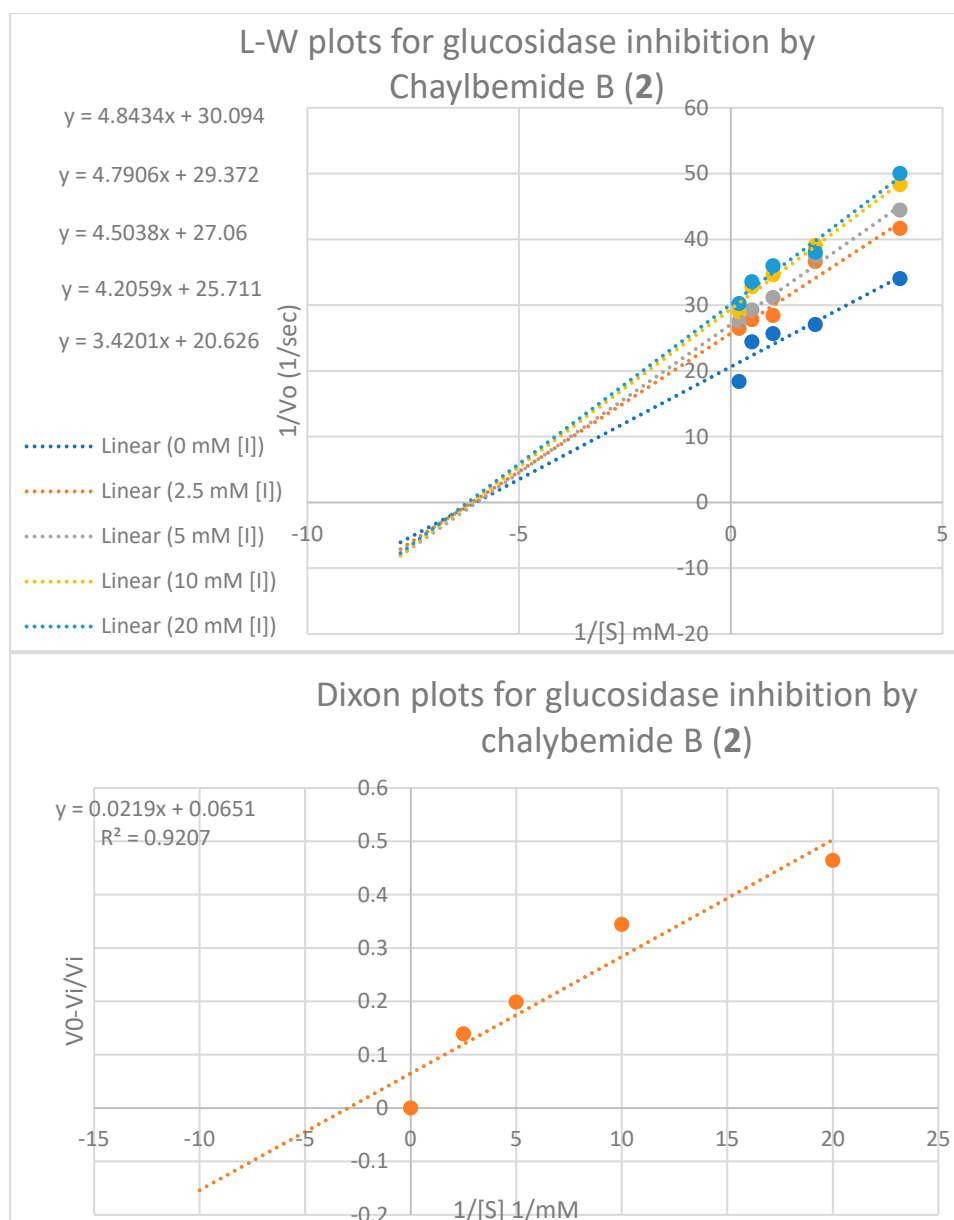

**Figure S4:** A- Double reciprocal (Lineweaver-Burk) plot for inhibition of  $\alpha$ -glucosidase (non-competitive inhibition,  $K_m = 6.10$  mM); B- Dixon plot for Chalybemide B (2),  $K_i = 44.58$  mM.

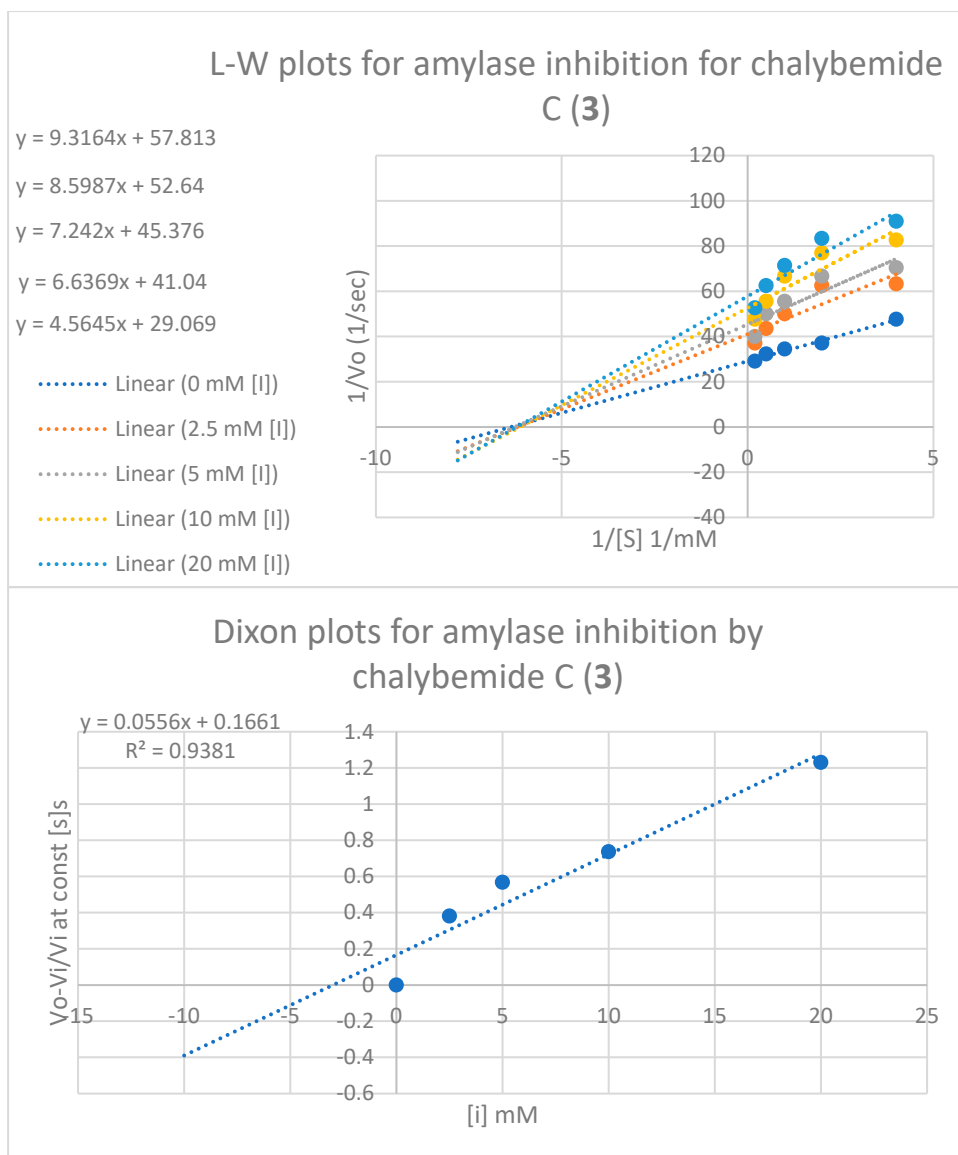

**Figure S5:** A- Double reciprocal (Lineweaver-Burk) plot for inhibition of  $\alpha$ -amylase (non-competitive inhibition,  $K_m = 6.23$  mM); B- Dixon plot for Chalybemide C (3),  $K_i = 26.96$  mM.

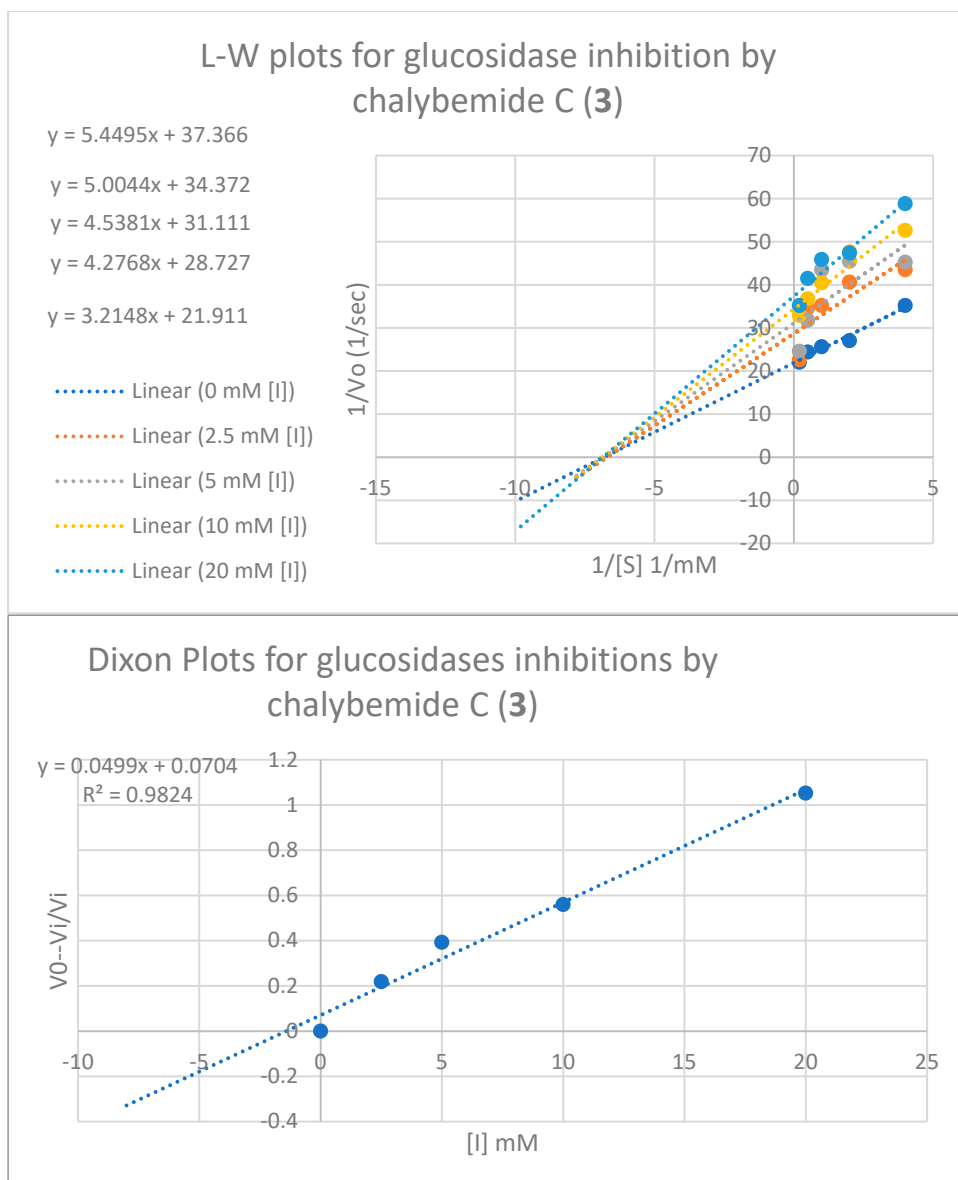

**Figure S6:** A- Double reciprocal (Lineweaver-Burk) plot for inhibition of  $\alpha$ -glucosidase (non-competitive inhibition,  $K_m = 6.82$  mM); B- Dixon plot for Chalybemide C (3),  $K_i = 34.73$  mM.

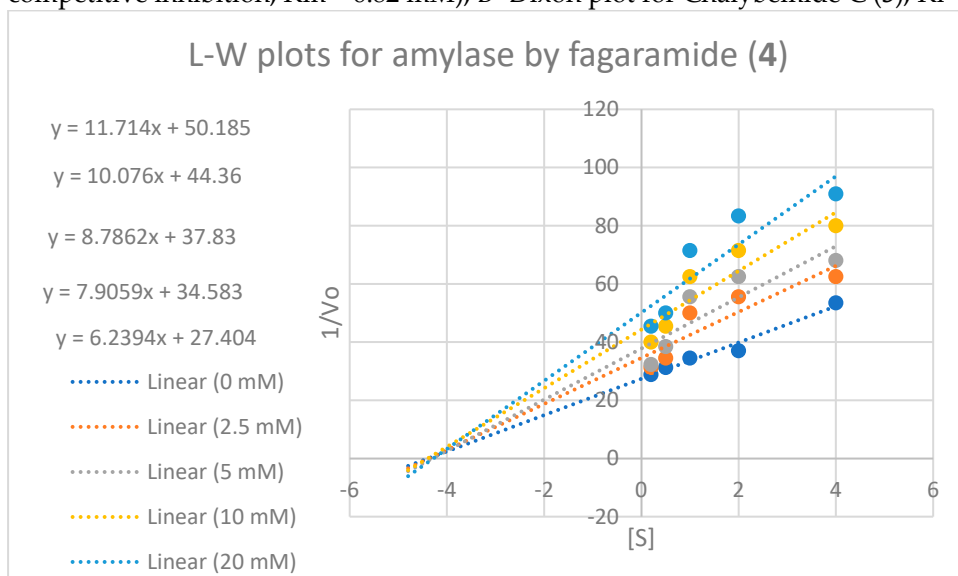

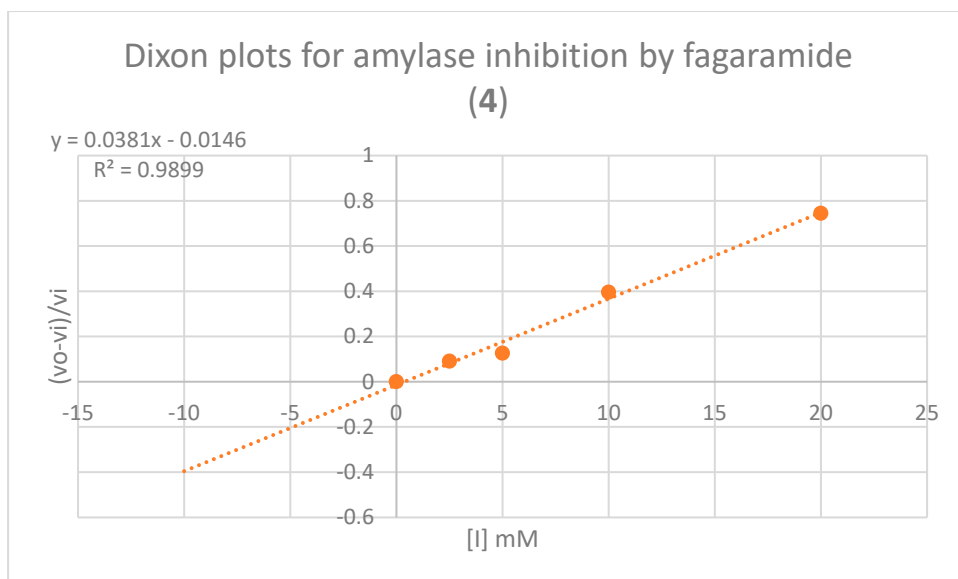

**Figure S7:** A- Double reciprocal (Lineweaver-Burk) plot for inhibition of  $\alpha$ -amylase (non-competitive inhibition,  $K_m = 4.34 \text{ mM}$ ); B- Dixon plot for fagaramide (4),  $K_i = 26.96 \text{ mM}$ .

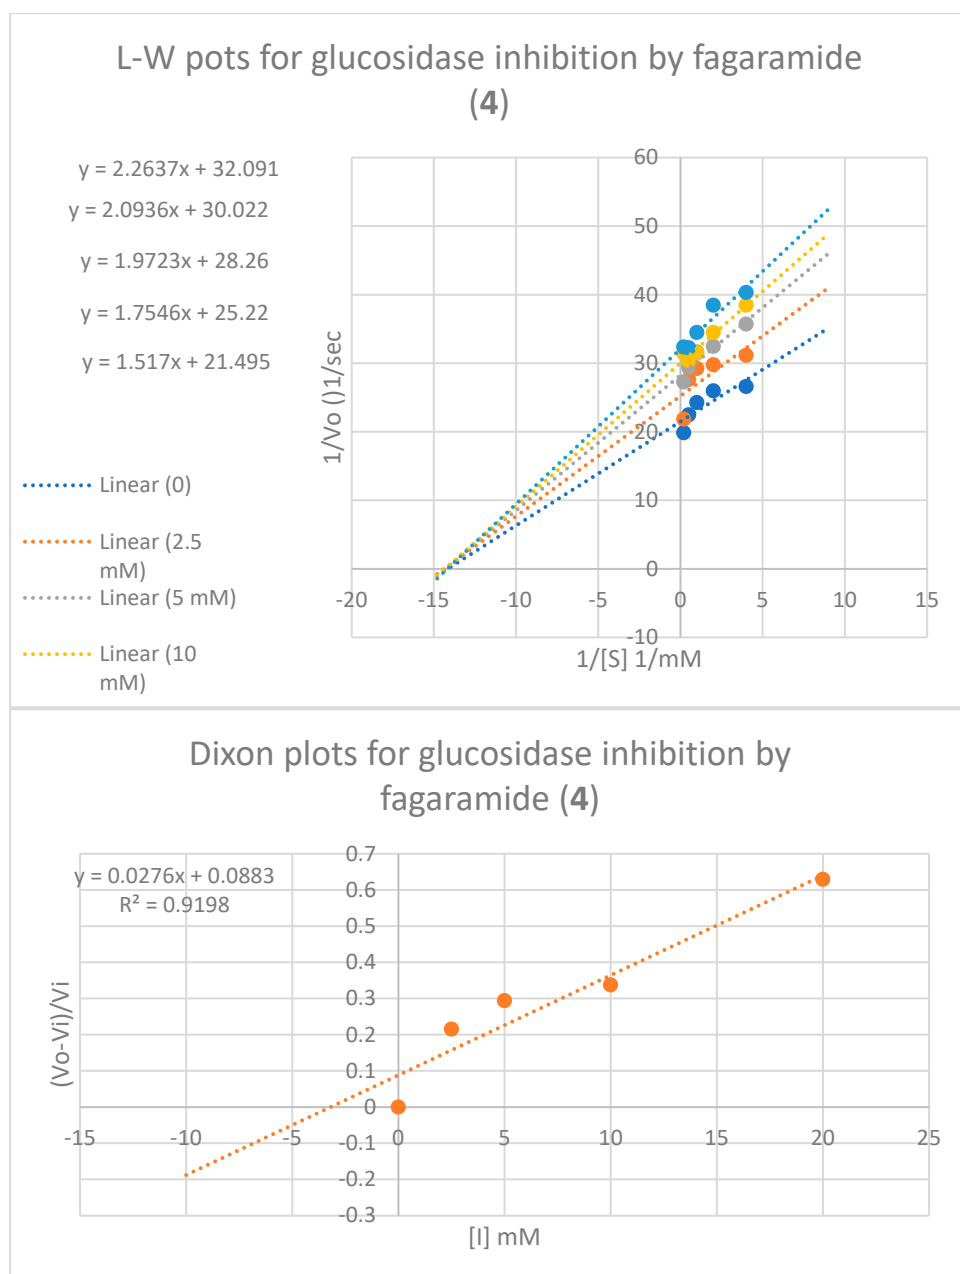

**Figure S8:** A- Double reciprocal (Lineweaver-Burk) plot for inhibition of  $\alpha$ -glucosidase (non-competitive inhibition,  $K_m = 14.25$  mM); B- Dixon plot for fagaramide (4),  $K_i = 26.96$  mM.

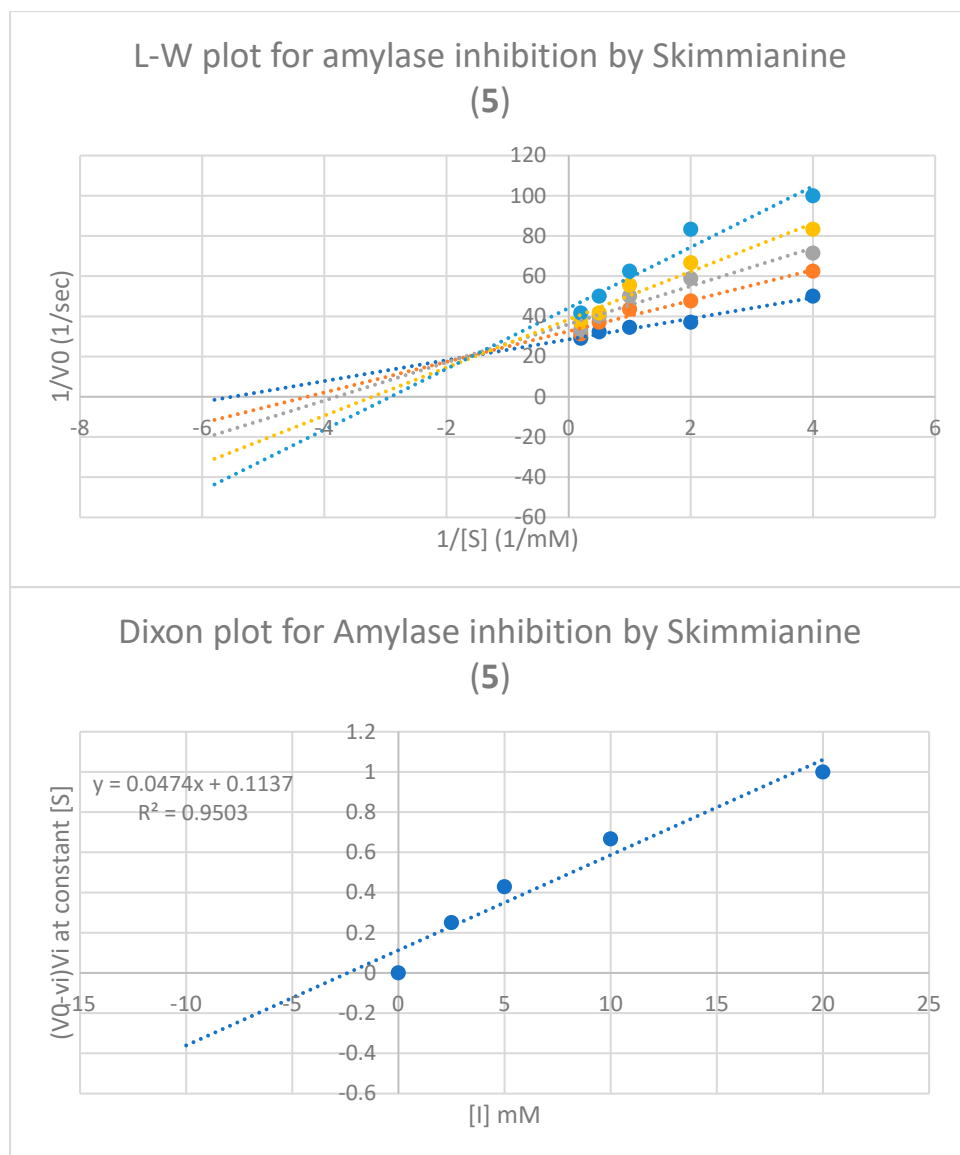

**Figure S9:** A- Double reciprocal (Lineweaver-Burk) plot for inhibition of  $\alpha$ -amylase (mixed inhibition, Varied  $K_m$ ); B- Dixon plot for Skimmianine (5),  $K_i = 2.74 \text{ mM}$ .

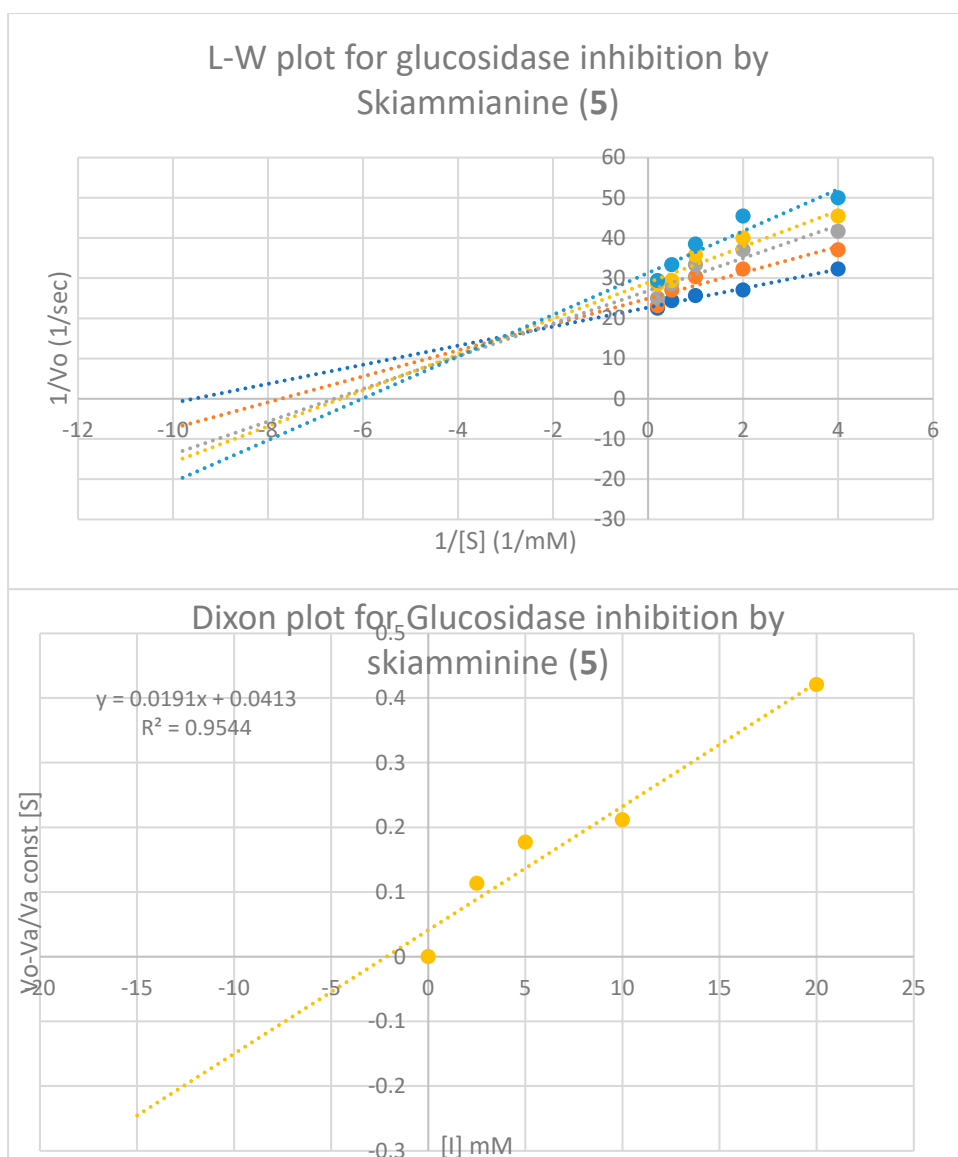

**Figure S10:** A- Double reciprocal (Lineweaver-Burk) plot for inhibition of  $\alpha$ -glucosidase (mixed inhibition, Varied  $K_m$ ); B- Dixon plot for Skiamminine (5),  $K_i = 7.64 \text{ mM}$ .

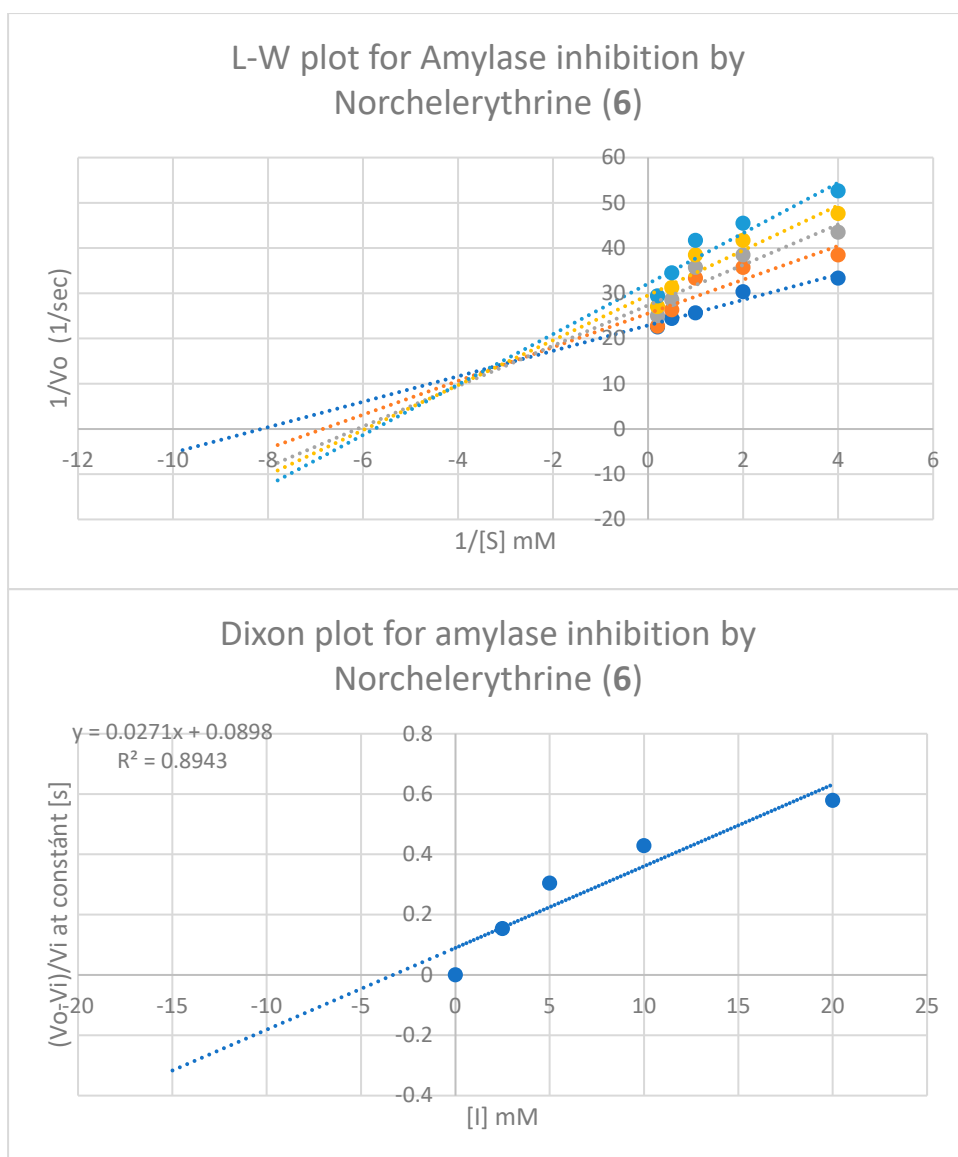

**Figure S11:** A- Double reciprocal (Lineweaver-Burk) plot for inhibition of  $\alpha$ -amylase (mixed inhibition, Varied  $K_m$ ); B- Dixon plot for Norchelerythrine (6),  $K_i = 6.51 \text{ mM}$ .

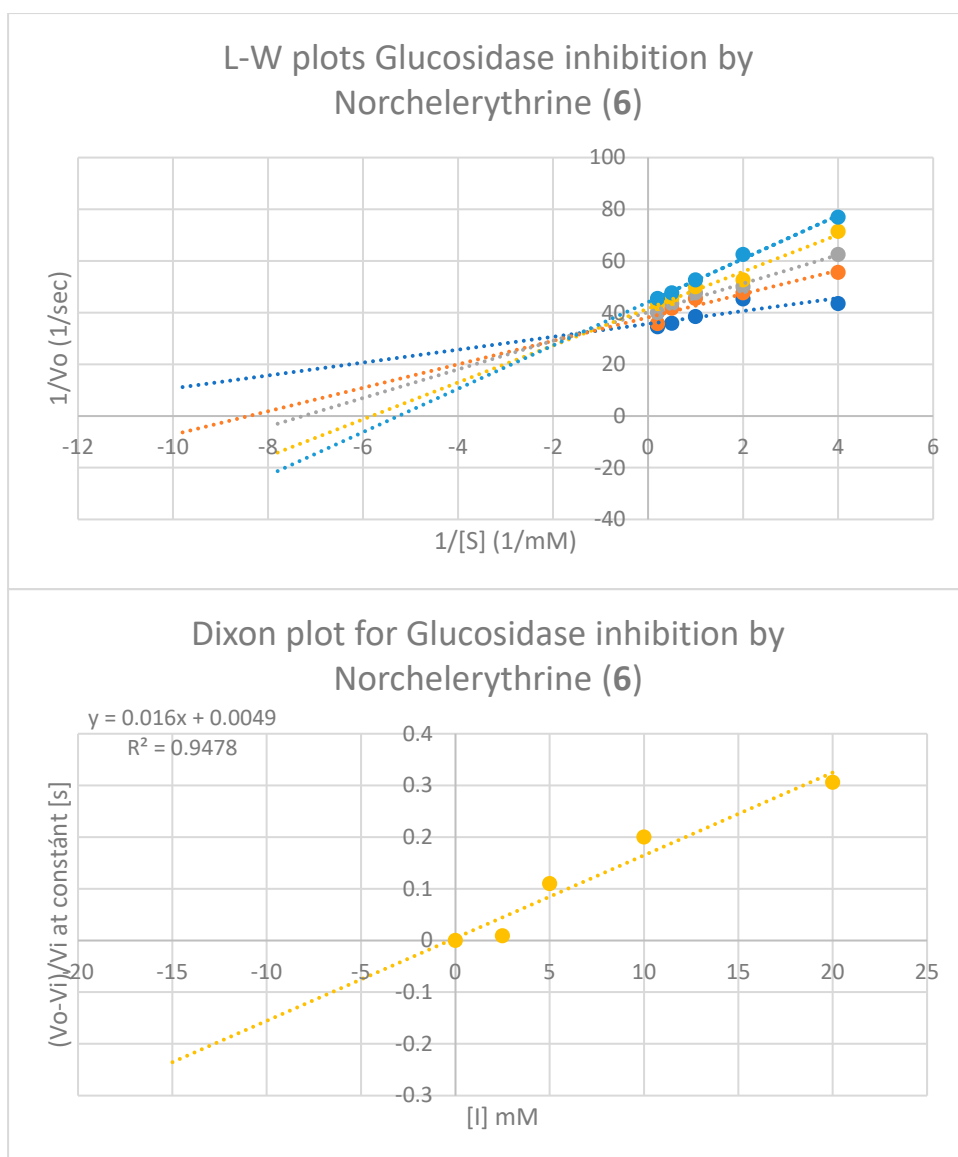

**Figure S12:** A- Double reciprocal (Lineweaver-Burk) plot for inhibition of  $\alpha$ -glucosidase (mixed inhibition, Varied  $K_m$ ); B- Dixon plot for Norchelerythrine (6),  $K_i = 7.68 \text{ mM}$ .

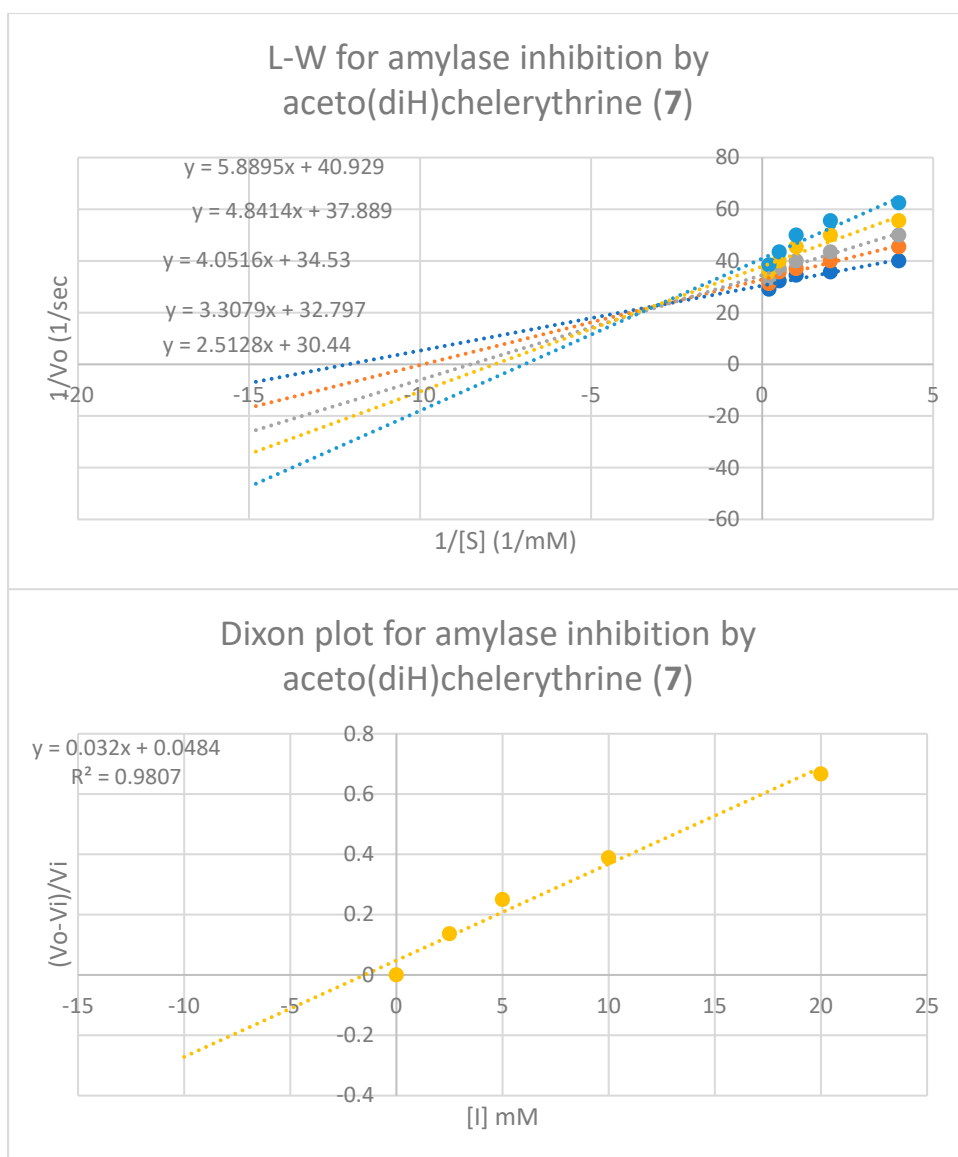

**Figure S13:** A- Double reciprocal (Lineweaver-Burk) plot for inhibition of  $\alpha$ -amylase (mixed inhibition, Varied  $K_m$ ); B- Dixon plot for 6-Acetyldihydrochelerythrine (7),  $K_i = 3.34$  mM.

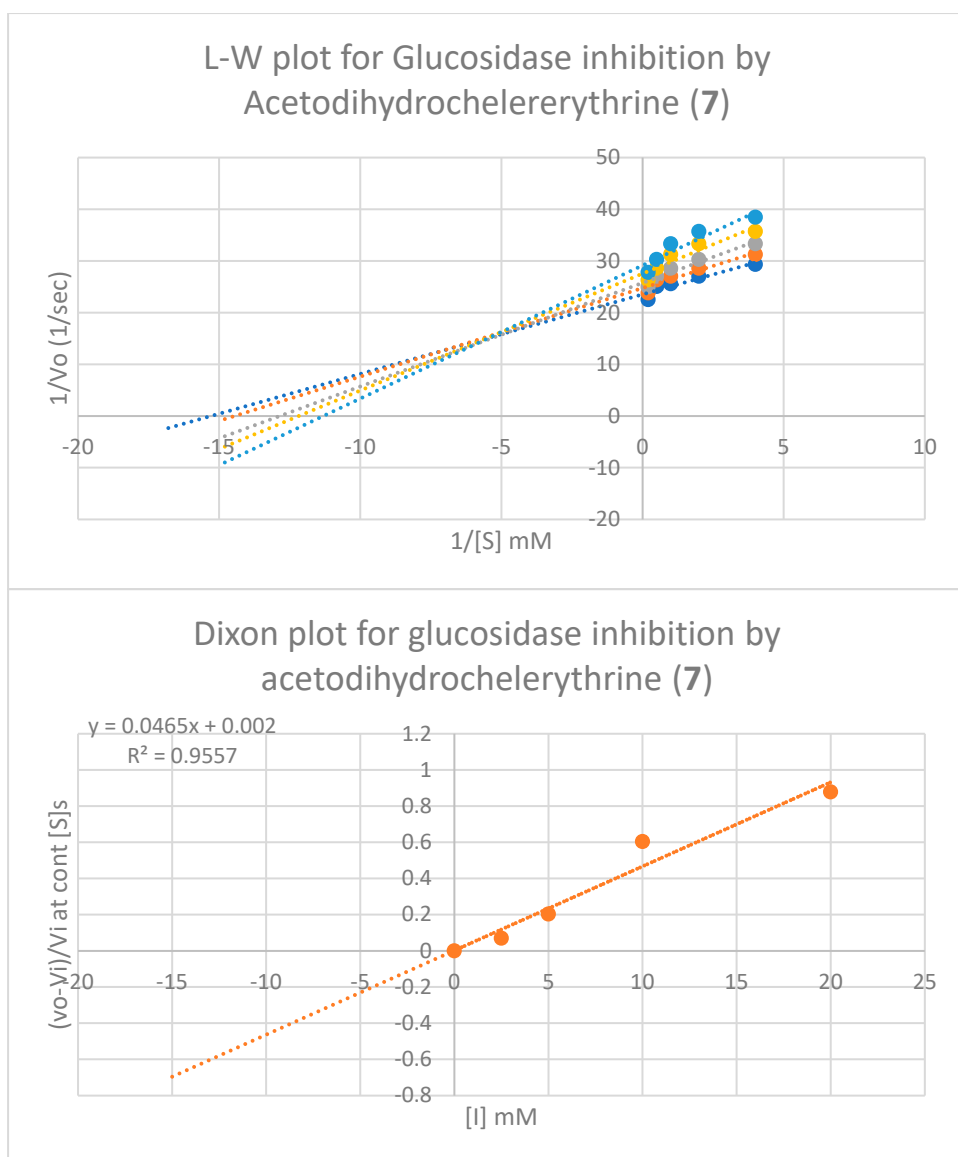

**Figure S14:** A- Double reciprocal (Lineweaver-Burk) plot for inhibition of  $\alpha$ -glucosidase (mixed inhibition, Varied  $K_m$ ); B- Dixon plot for 6-Acetyldihydrochelererythrine (7),  $K_i = 4.73 \text{ mM}$ .

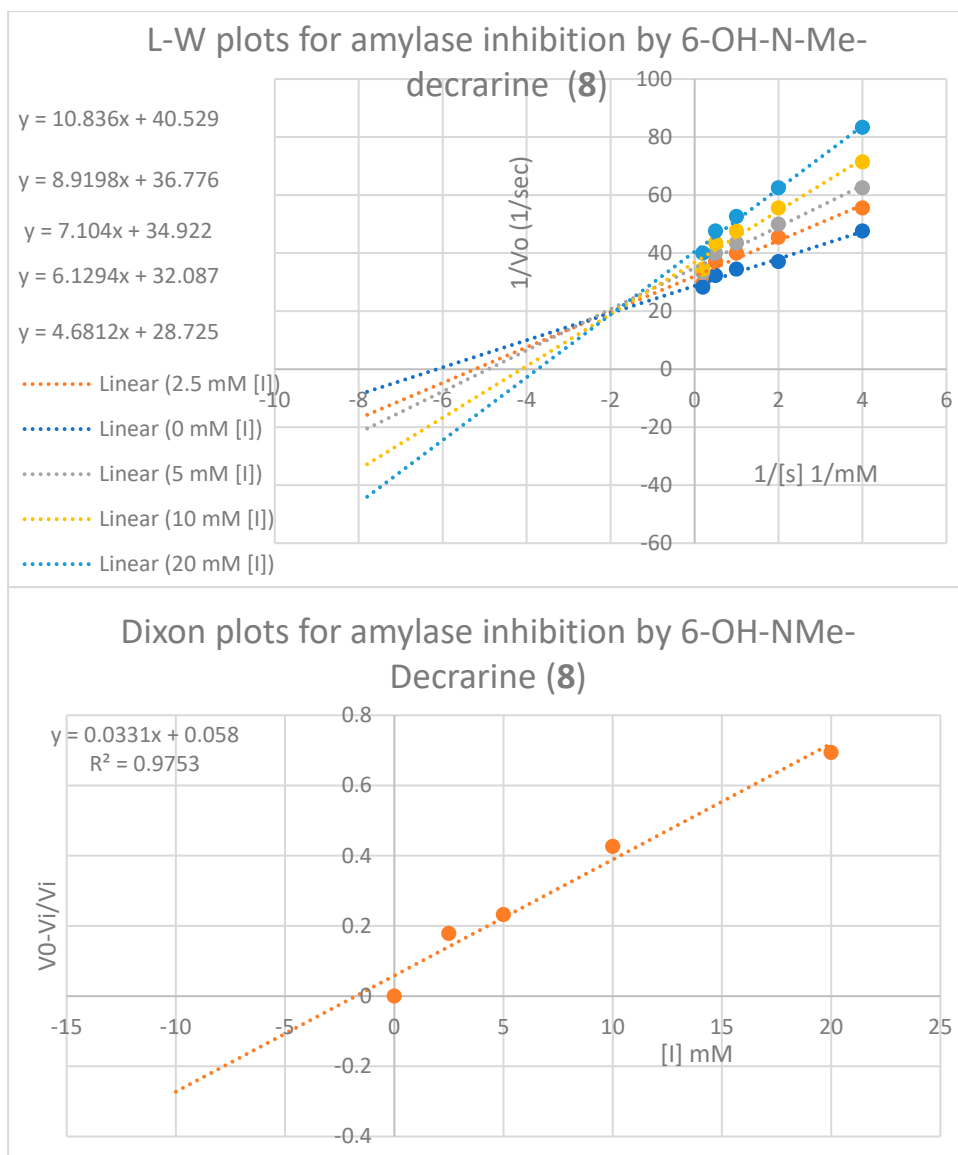

**Figure S15:** A- Double reciprocal (Lineweaver-Burk) plot for inhibition of  $\alpha$ -amylase (mixed inhibition, varied  $K_m$ ); B- Dixon plot for 6-hydroxy-N-methyldecarine (8),  $K_i = 3.10 \text{ mM}$ .

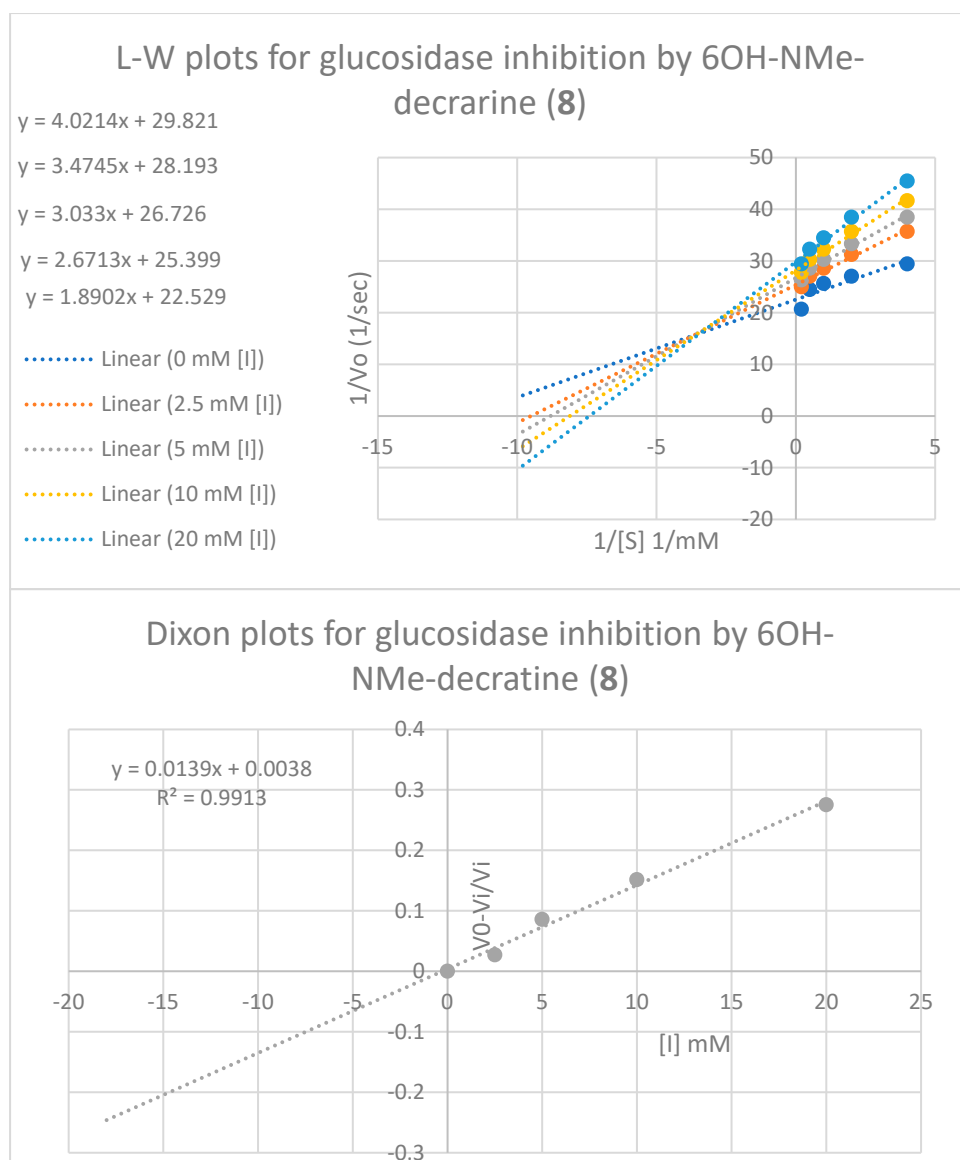

**Figure S16:** A- Double reciprocal (Lineweaver-Burk) plot for inhibition of  $\alpha$ -glucosidase (mixed inhibition, varied  $K_m$ ); B- Dixon plot for 6-hydroxy-N-methyldecrarine (8),  $K_i = 9.17$  mM.

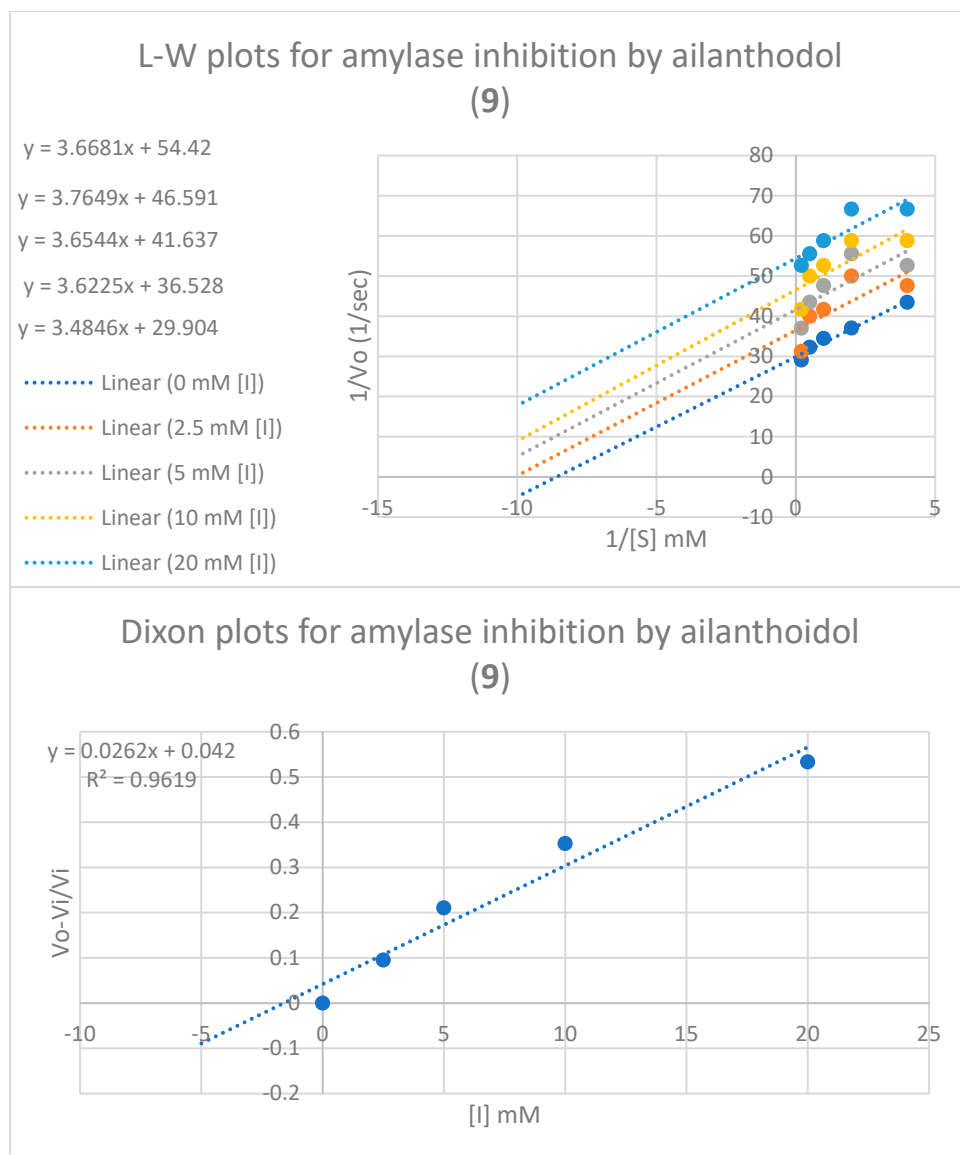

**Figure S17:** A- Double reciprocal (Lineweaver-Burk) plot for inhibition of  $\alpha$ -amylase (un-competitive inhibition, varied  $K_m$ ); B- Dixon plot for Ailanthodial (9),  $K_i = 26.28 \text{ mM}$ .

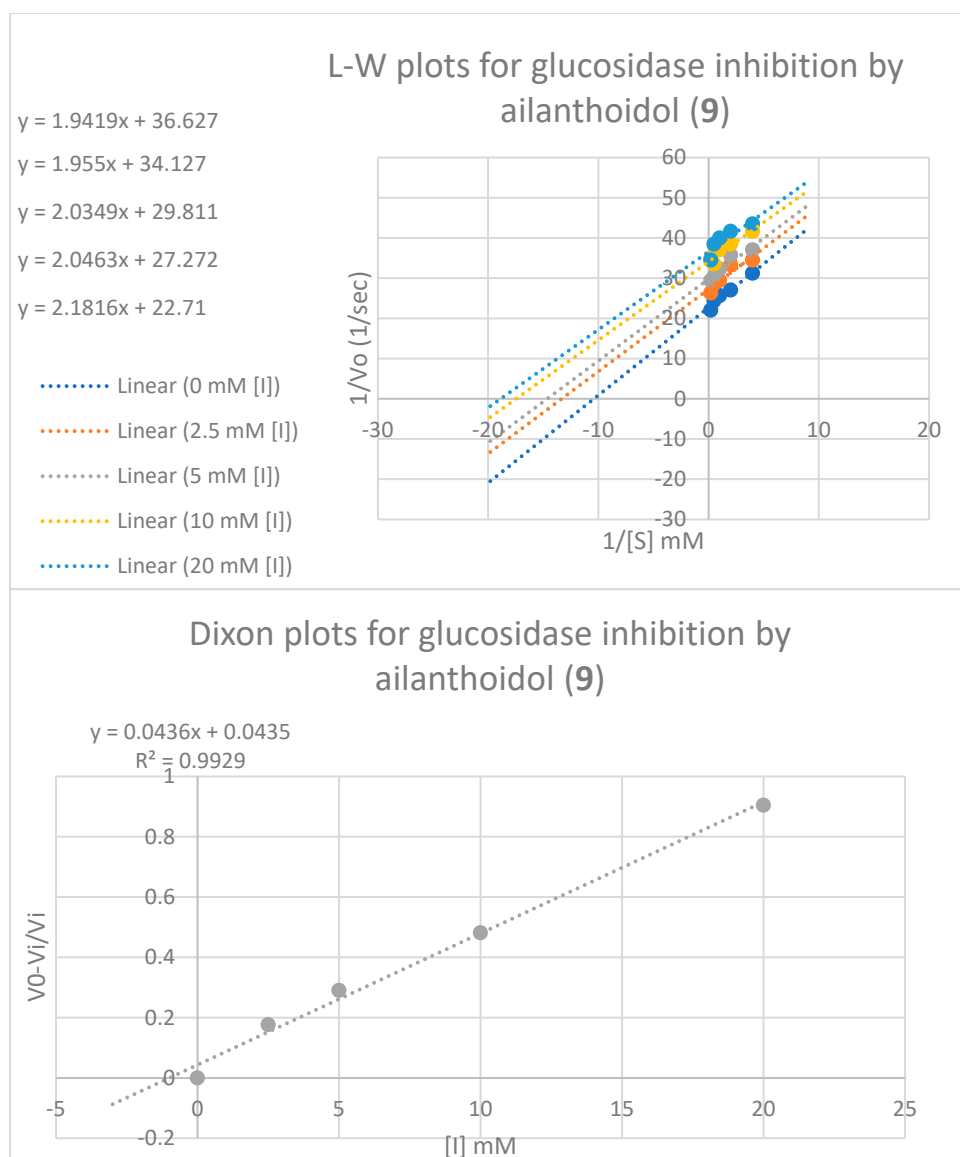

**Figure S18:** A- Double reciprocal (Lineweaver-Burk) plot for inhibition of  $\alpha$ -glucosidase (non-competitive inhibition,  $K_m = 5.53$  mM); B- Dixon plot for Ailanthoidol (9),  $K_i = 20.63$  mM.

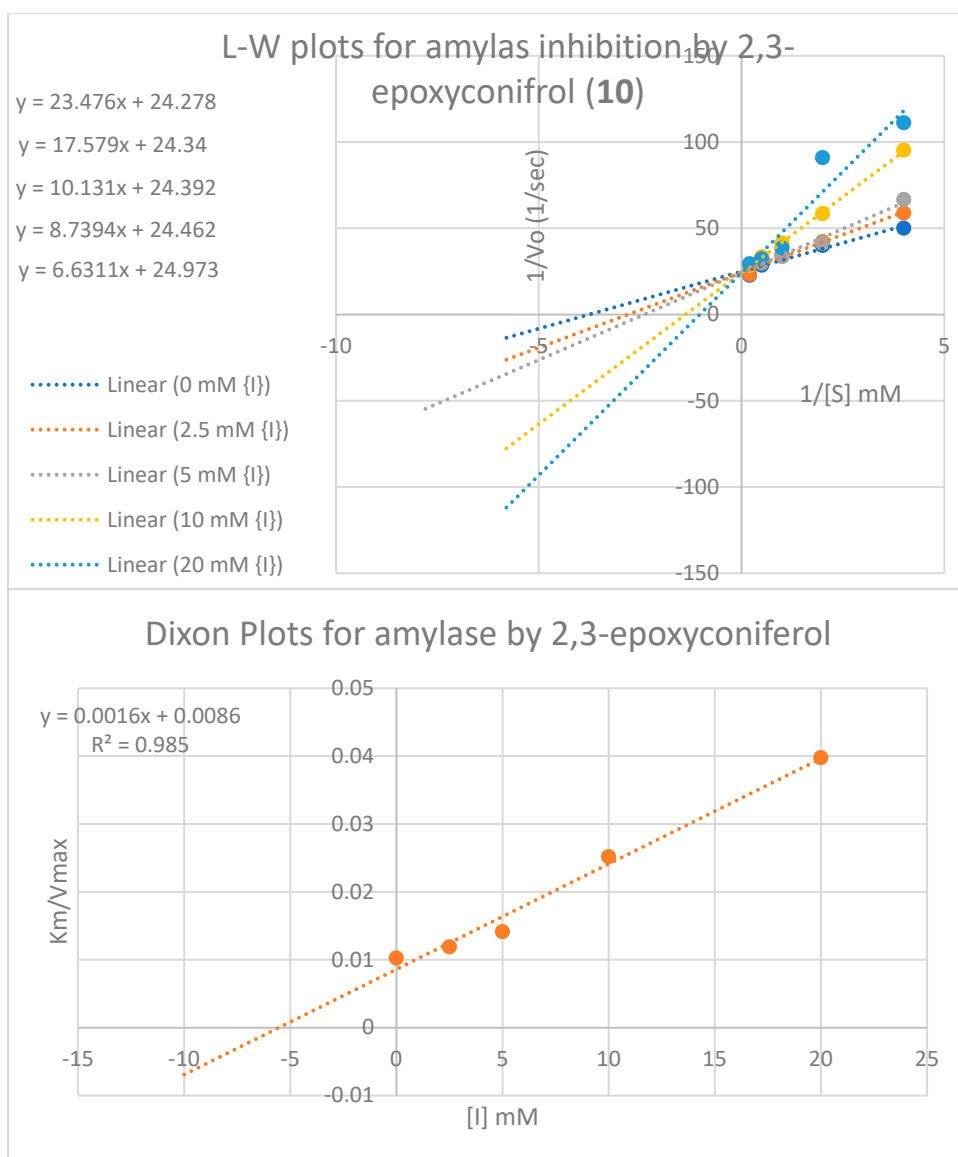

**Figure S19:** A- Double reciprocal (Lineweaver-Burk) plot for inhibition of  $\alpha$ -amylase (competitive inhibition,  $1/V_{max} = 24.47 \text{ sec}^{-1}$ ); B- Dixon plot for 2,3-epoxy-6,7-methylenedioxyconiferol (**10**),  $K_i = 5.54 \text{ mM}$ .

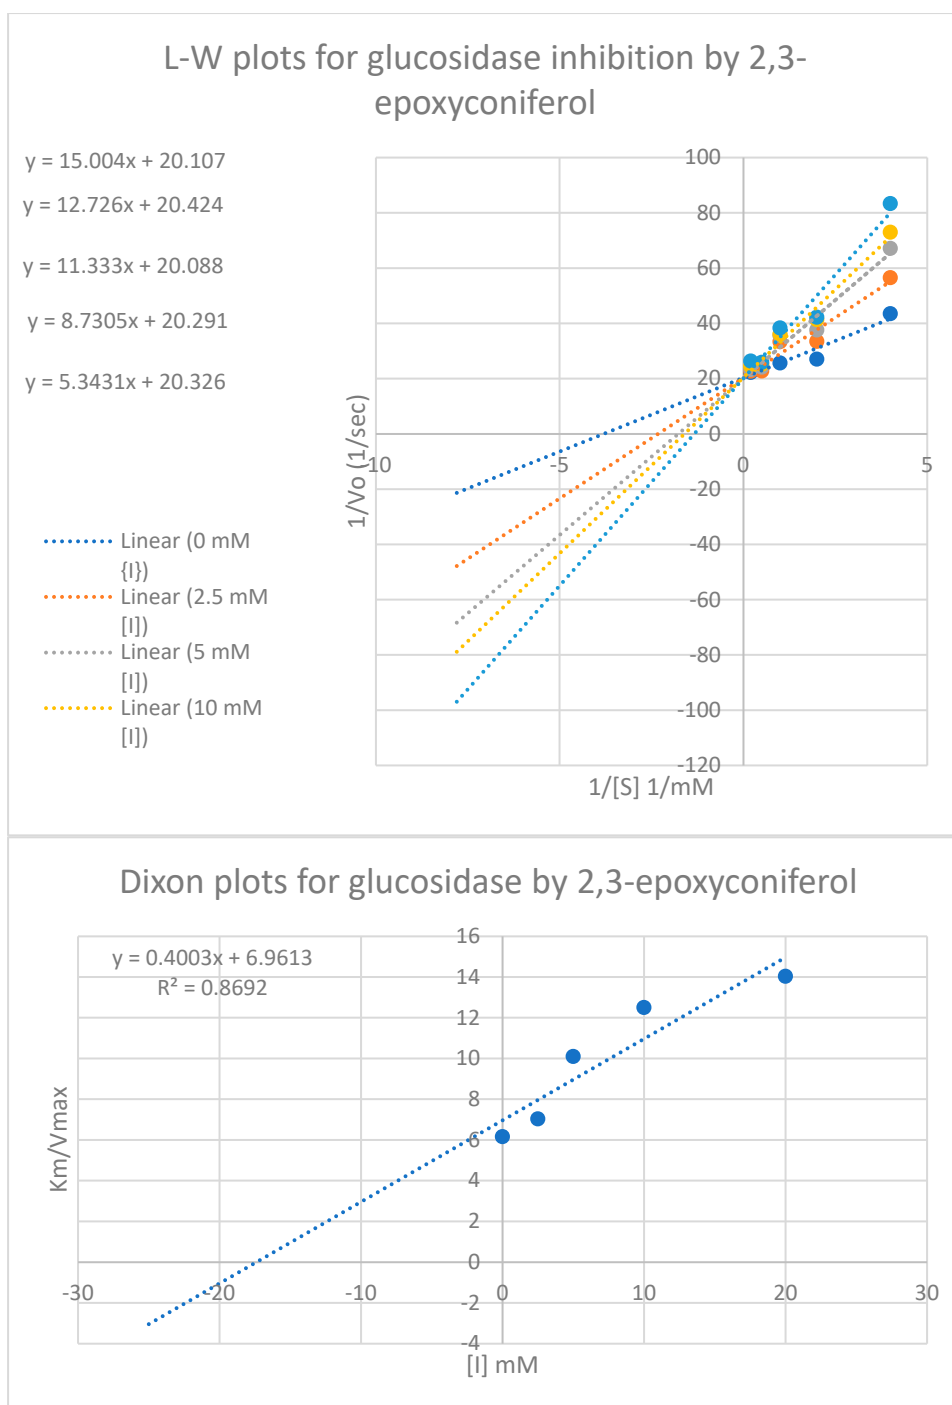

**Figure S20:** A- Double reciprocal (Lineweaver-Burk) plot for inhibition of  $\alpha$ -glucosidase (competitive inhibition,  $1/V_{\max} = 20.25 \text{ sec}^{-1}$ ); B- Dixon plot for 2,3-epoxy-6,7-methylenedioxyconiferol (**10**),  $K_i = 17.21 \text{ mM}$ .

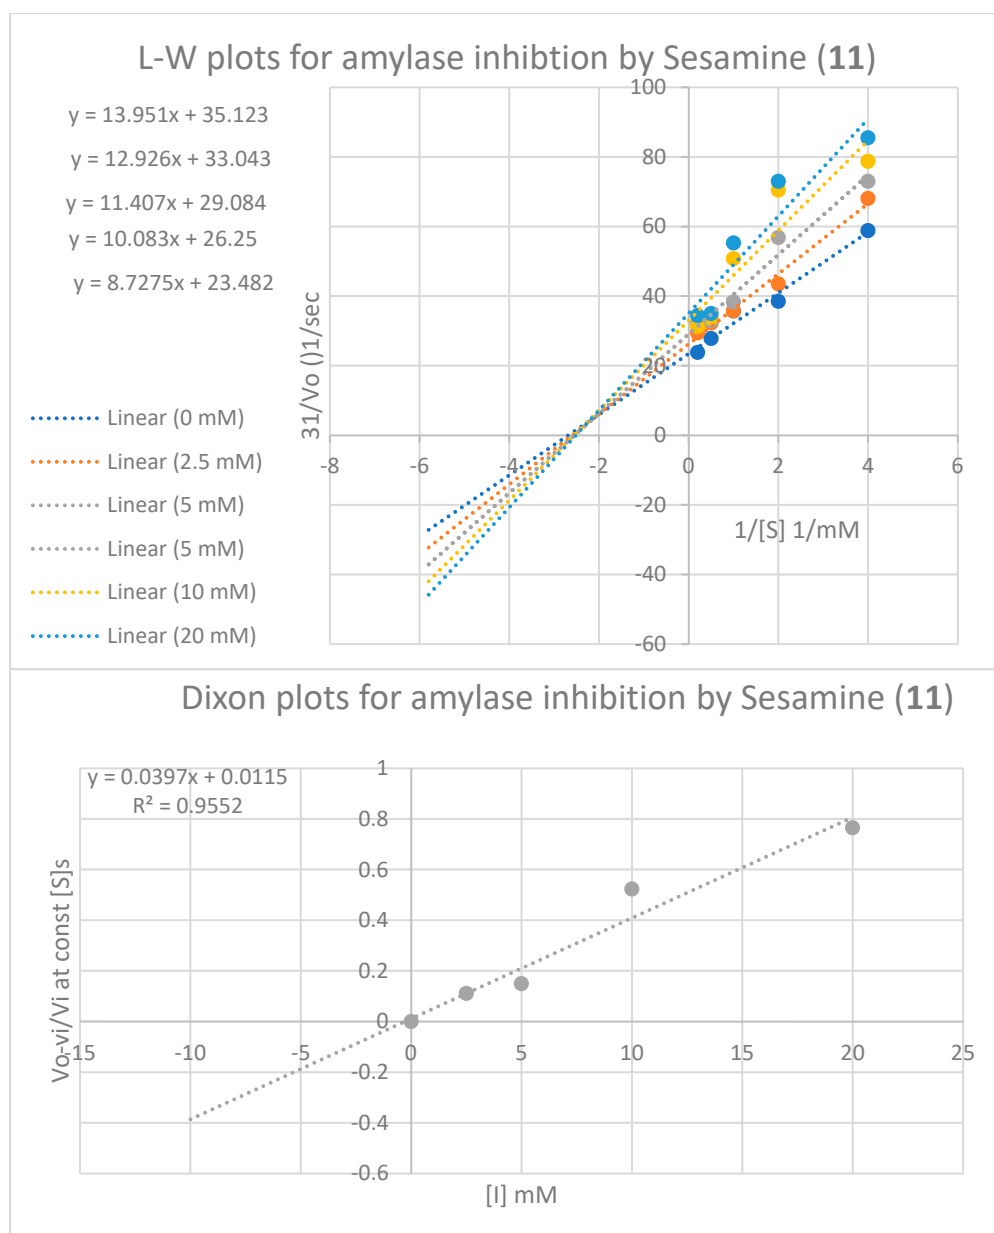

**Figure S21:** A- Double reciprocal (Lineweaver-Burk) plot for inhibition of  $\alpha$ -amylase (non-competitive inhibition,  $K_m = 2.69$  mM); B- Dixon plot for Sesamine (**11**),  $K_i = 12.53$  mM.

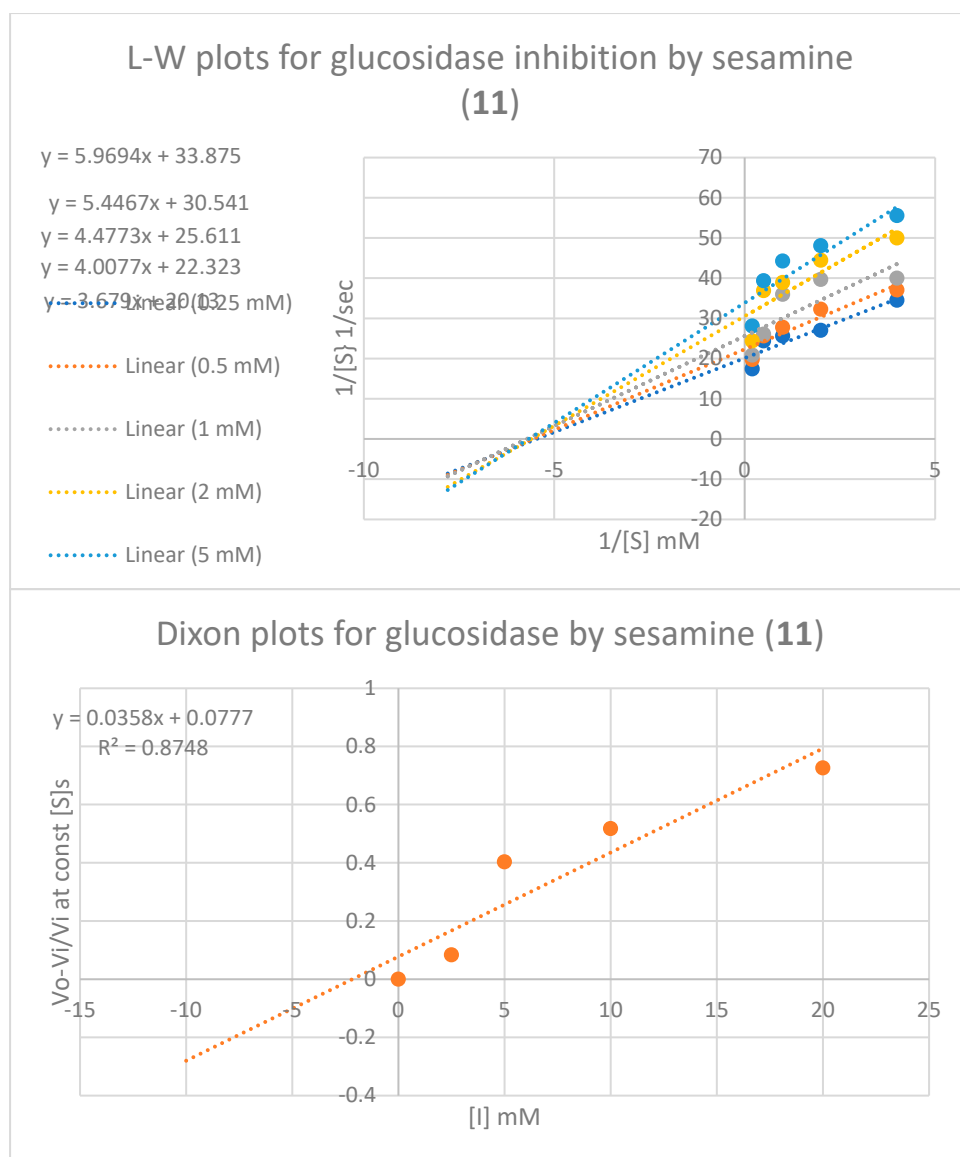

**Figure S22:** A- Double reciprocal (Lineweaver-Burk) plot for inhibition of  $\alpha$ -glucosidase (non-competitive inhibition,  $K_m = 5.61$  mM); B- Dixon plot for Sesamine (**11**),  $K_i = 24.33$  mM.

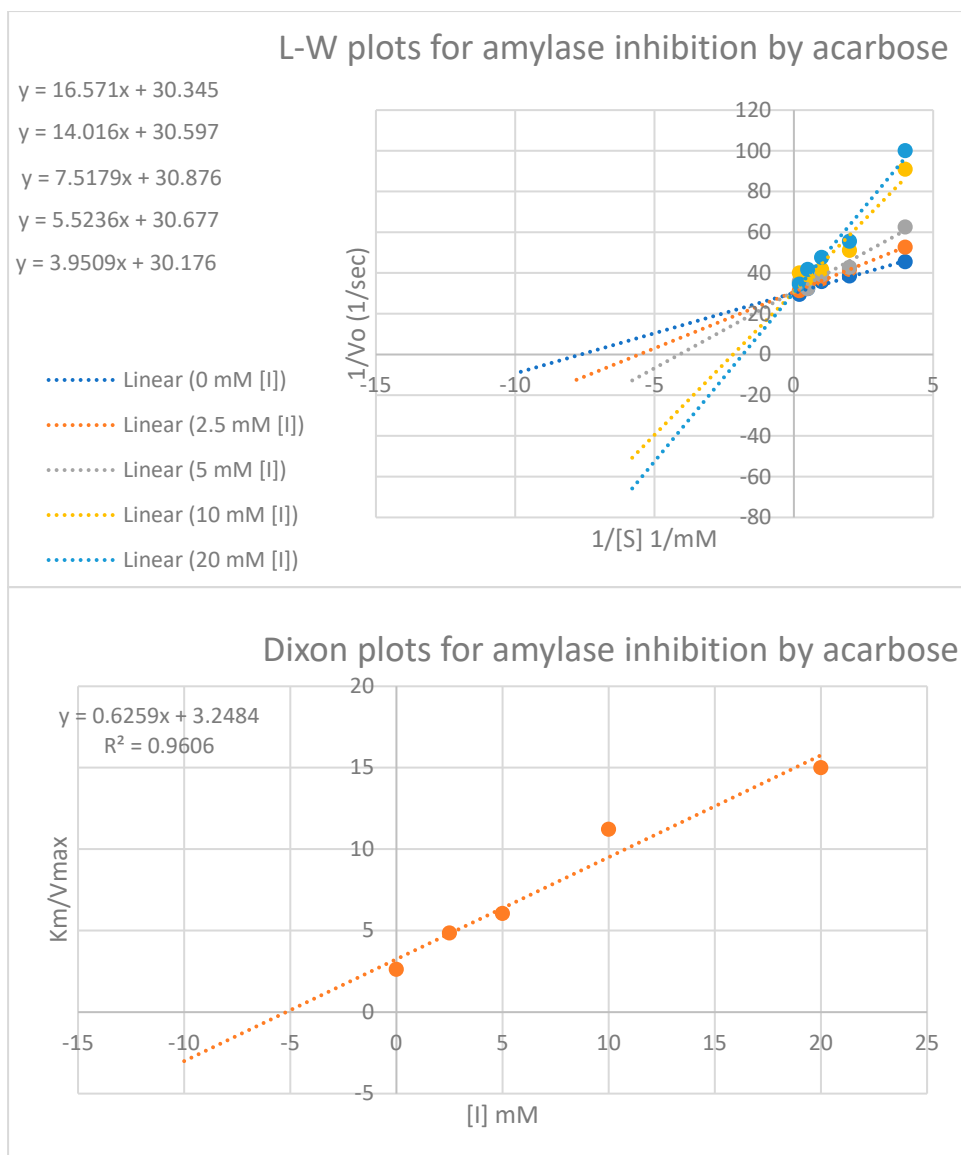

**Figure S23:** A- Double reciprocal (Lineweaver-Burk) plot for inhibition of  $\alpha$ -amylase (competitive inhibition,  $1/V_{\max} = 30.45 \text{ sec}^{-1}$ ); B- Dixon plot for acarbose  $K_i = 6.14 \text{ mM}$ .

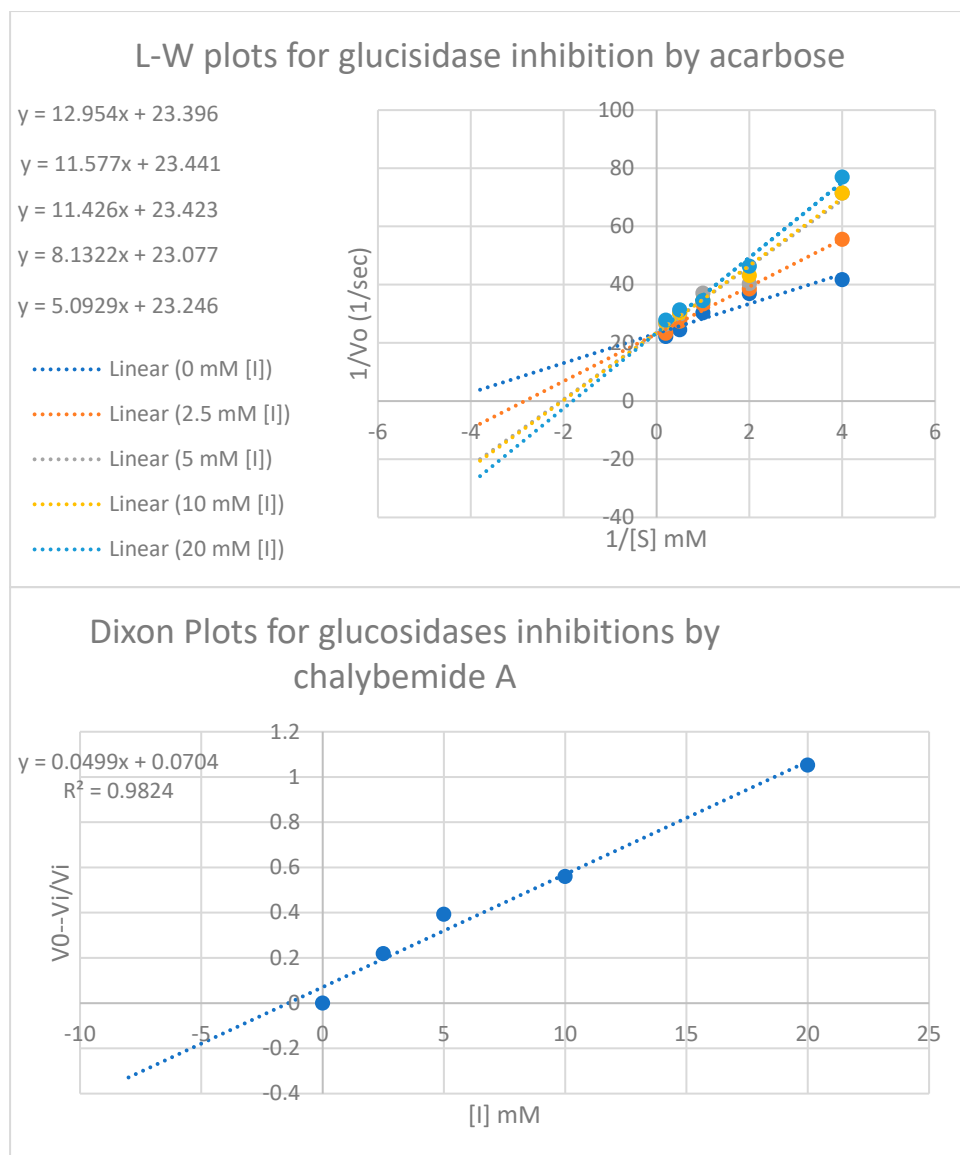

Figure S24: A- Double reciprocal (Lineweaver-Burk) plot for inhibition of  $\alpha$ -glucosidase (competitive inhibition,  $1/V_{\max} = 23.32 \text{ sec}^{-1}$ ); B: Dixon plot for Acarbose,  $K_i = 22.40 \text{ mM}$ .

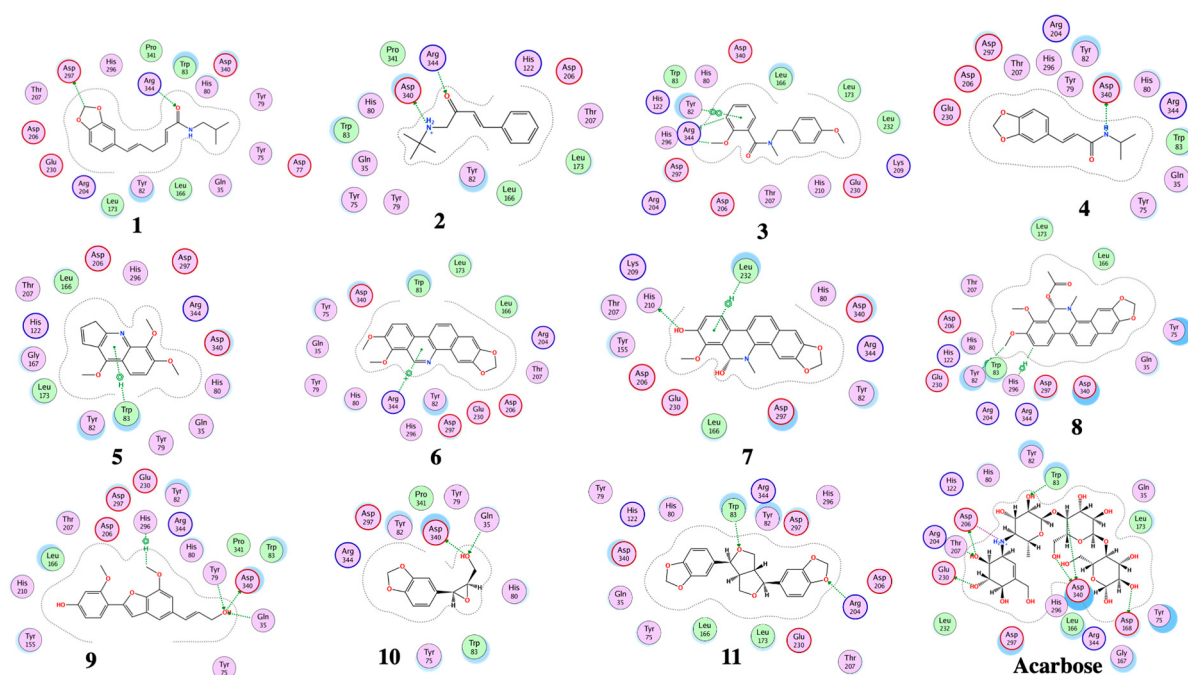

**Figure S25:** 2D interactions of compounds 1-11 and the reference Acarbose with  $\alpha$ -amylase enzyme (PDB ID: 7TAA).

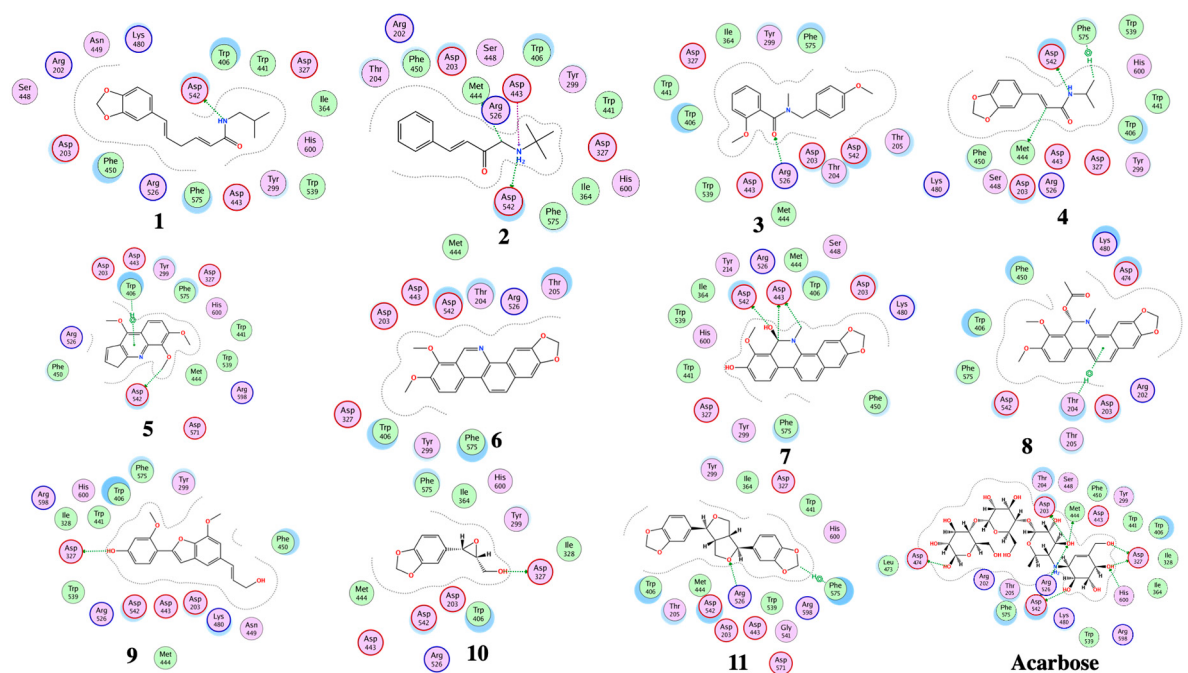

**Figure S26:** 2D interactions of compounds 1-11 and the reference Acarbose with  $\alpha$ -glucosidase enzyme (PDB ID: 2QMJ).

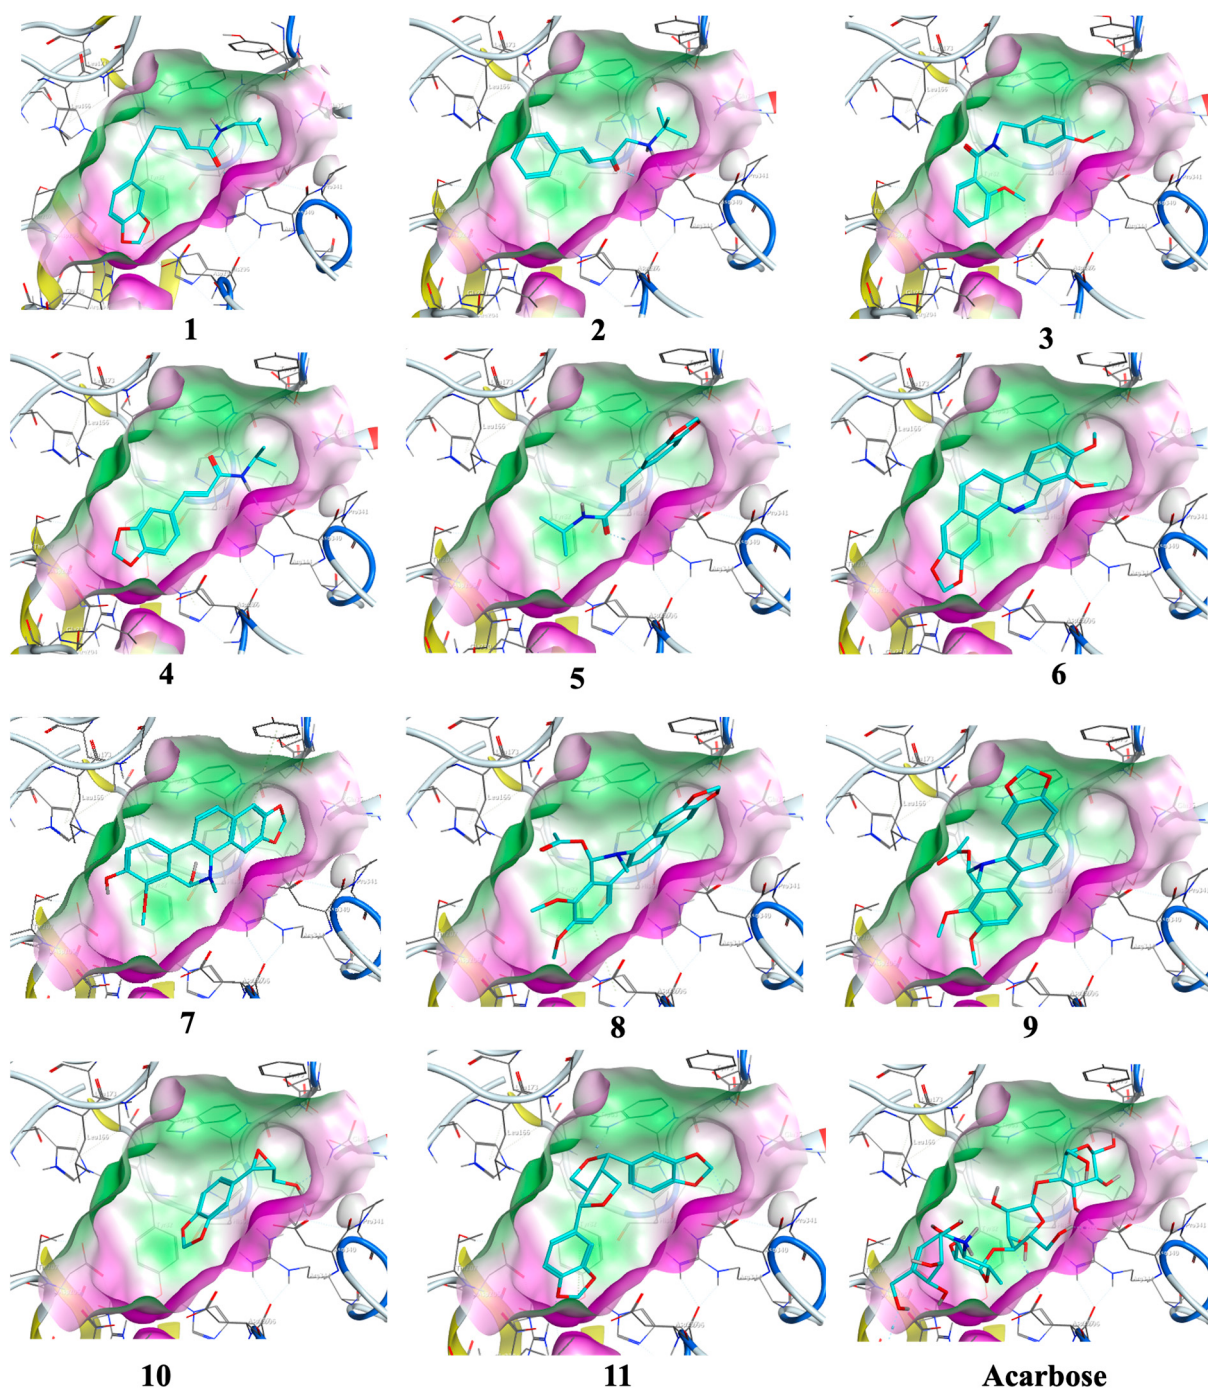

**Figure S27:** Docking conformation with the highest score for compounds 1-11 and the reference acarbose (carbon atoms in cyan) in the binding site of α-amylase (ID: 7TAA). Lipophilic areas on the molecular surface are colored green, while hydrophilic areas are colored purple.

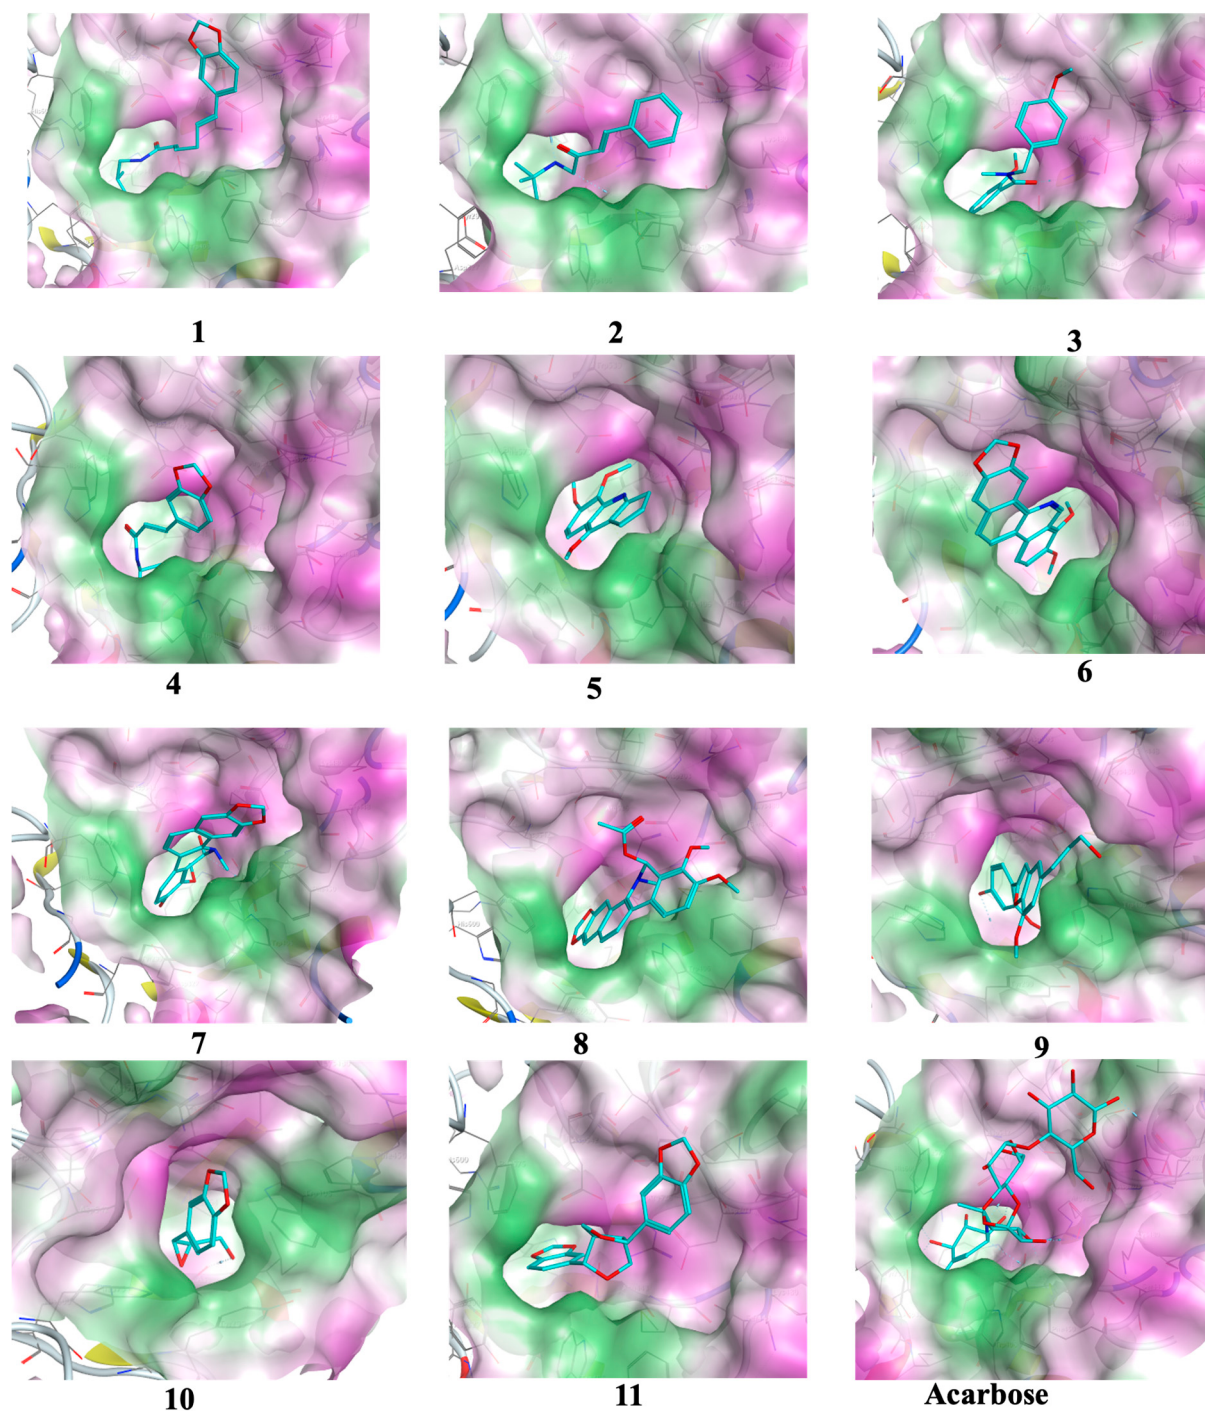

**Figure S28:** Docking conformation with the highest score for compounds 1-11 and the reference acarbose (carbon atoms in cyan) in the binding site of  $\alpha$ -glucosidase (ID: 2QMJ). Lipophilic areas on the molecular surface are coloured green, while hydrophilic areas are coloured purple.
